# Supplementary material for: Tridentate κ3-P,P,C iridium complexes: influence of ligand saturation on intramolecular C–H bond activation
Source: Royal Society of Chemistry journal article supplement (doi:10.1039/d4cc01435a), 2024-01-01
Supplement: d4cc01435a2.pdf [file d4cc01435a2.pdf]

*Supporting information for:*

---

**Tridentate  $\kappa^3$ -*P,P,C* Iridium Complexes:  
Influence of Ligand Saturation on Intramolecular C–H Bond Activation**

Mitchell J. Demchuk,<sup>a</sup> Joseph A. Zurakowski,<sup>a,b</sup> Marcus W. Drover<sup>a,\*</sup>

---

\*E-mail: [marcus.drover@uwo.ca](mailto:marcus.drover@uwo.ca)

<sup>a</sup>Department of Chemistry, Western University, 1151 Richmond Street, London,  
ON, N8K 3G6, Canada

<sup>b</sup>Department of Chemistry and Biochemistry, The University of Windsor, 401 Sunset Avenue, Windsor,  
ON, N9B 3P4, Canada

|                             |     |
|-----------------------------|-----|
| 1. Experimental Section     | S2  |
| 2. Preparation of Compounds | S3  |
| 3. Multinuclear NMR Data    | S8  |
| 4. IR Data                  | S26 |
| 5. Computational Details    | S29 |
| 6. Crystallographic Details | S31 |
| 7. References               | S34 |

## **Experimental Section:**

**General Considerations.** All experiments were carried out employing standard Schlenk techniques under an atmosphere of dry nitrogen employing degassed, dried solvents in a solvent purification system supplied by PPT, LLC. Non-halogenated solvents were tested with a standard purple solution of sodium benzophenone ketyl in tetrahydrofuran to confirm effective moisture removal. *d*<sub>6</sub>-benzene was dried over molecular sieves and degassed by three freeze-pump-thaw cycles. Dicyclohexylborane (HBCy<sub>2</sub>),<sup>1</sup> *tri*-*tert*-butyl-allyl-diphosphinoethane (t<sup>f</sup>bape)<sup>2</sup> and *tri*-*tert*-butyl-*n*-propyldicyclohexylboranyl-diphosphinoethane (t<sup>f</sup>bbpe)<sup>2</sup> were prepared using literature procedures. Other reagents were purchased from commercial vendors and used without further purification unless otherwise stated.

**Physical methods.** <sup>1</sup>H NMR spectra are reported in parts per million (ppm) and are referenced to residual solvent e.g., <sup>1</sup>H(C<sub>6</sub>D<sub>6</sub>): δ 7.16; <sup>13</sup>C(C<sub>6</sub>D<sub>6</sub>): 128.06; coupling constants are reported in Hz. <sup>13</sup>C{<sup>1</sup>H}, <sup>11</sup>B{<sup>1</sup>H}, and <sup>31</sup>P{<sup>1</sup>H} NMR spectra were performed as proton-decoupled experiments and are reported in ppm.

## Preparation of Compounds:

**[Ir<sup>I</sup>(κ<sup>3</sup>-(CH<sub>2</sub>)<sub>3</sub>PP<sup>t</sup>Bu<sub>3</sub>)(COD)] (±)-1:** C<sub>25</sub>H<sub>49</sub>P<sub>2</sub>Ir, M<sub>w</sub> = 603.8 g/mol):

In the glovebox, [Ir(μ-OCH<sub>3</sub>)(COD)]<sub>2</sub> (24 mg, 0.036 mmol, 1 equiv.) was weighed into a 20 mL scintillation vial equipped with a stir bar and dissolved in *ca.* 0.5 mL THF. Then, <sup>t</sup>bbpe (35 mg, 0.073 mmol, 2 equivs.) was dissolved in *ca.* 1 mL THF and added to the vial while mixing, immediately turning dark yellow/murky

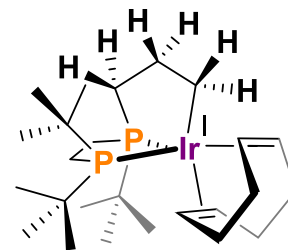

orange. This reaction was allowed to stir for 3 h, resulting in a murky dark orange solution, after which volatiles were removed *in vacuo*. The resulting orange oily solid was dissolved in pentane and filtered using Celite<sup>®</sup> (the crude yield after this step was 47 mg (107%), as side product, MeO-BCy<sub>2</sub> was still present; >96% purity *via* <sup>31</sup>P{<sup>1</sup>H} NMR spectroscopy). Orange crystals suitable for analysis by single crystal X-Ray diffraction were grown from a minimal amount of pentane at -35 °C over the course of 3 days (more material can be obtained from subsequent crystallizations). These crystals can be quickly washed with cold pentane to remove the side product, CH<sub>3</sub>OBCy<sub>2</sub> to give (±)-1 in >99% purity *via* <sup>31</sup>P{<sup>1</sup>H} NMR spectroscopy (18 mg, 41%). **<sup>1</sup>H NMR (600 MHz, C<sub>6</sub>D<sub>6</sub>, 298 K):** δ<sub>H</sub> = 4.40 (br, 1H; CH COD), 3.72 (br, 1H; CH COD), 3.16 – 2.08 (br, 10H), 2.01 (m, 2H), 1.77 (m, 2H), 1.56 (m, 1H), 1.47 (m, 1H), 1.35 (m, 2H), 1.25 (d, 9H; <sup>3</sup>J<sub>H,P</sub> = 11.2 Hz; <sup>t</sup>Bu CH<sub>3</sub>), 1.11 (d, 9H; <sup>3</sup>J<sub>H,P</sub> = 11.6 Hz; <sup>t</sup>Bu CH<sub>3</sub>), 1.01 (d, 9H; <sup>3</sup>J<sub>H,P</sub> = 10.2 Hz; <sup>t</sup>Bu CH<sub>3</sub>), 0.86 (m, 2H; CH<sub>2</sub>). **<sup>13</sup>C{<sup>1</sup>H} NMR (151 MHz, C<sub>6</sub>D<sub>6</sub>, 298 K):** δ<sub>C</sub> = 64.3 (br, CH COD), 62.7 (br, CH COD), 53.6 (br, CH COD), 49.6 (br, CH COD), 38.6 (br, CH<sub>2</sub> COD), 38.4 (dd, J<sub>C,P</sub> = 10.8, 5.5 Hz), 36.5 (br, CH<sub>2</sub> COD), 36.5 (dd, J<sub>C,P</sub> = 22.4, 7.2 Hz), 35.9 (dd, J<sub>C,P</sub> = 3.6, 1.1 Hz), 35.2 (dd, J<sub>C,P</sub> = 25.3, 5.1 Hz), 34.1 (br, CH<sub>2</sub> COD), 32.5 (d, J<sub>C,P</sub> = 4.2 Hz), 32.4 (br, CH<sub>2</sub> COD), 32.3 (dd, J<sub>C,P</sub> = 10.6, 4.7 Hz), 31.3 (d, J<sub>C,P</sub> = 5.00 Hz), 30.2 (dd, J<sub>C,P</sub> = 18.8, 15.6 Hz), 28.2 (d, J<sub>C,P</sub> = 5.8 Hz), 19.9 (dd, J<sub>C,P</sub> = 16.1, 11.7 Hz), 19.8 (dd, J<sub>C,P</sub> = 5.0, 3.7 Hz). **<sup>31</sup>P{<sup>1</sup>H} NMR (121 MHz, C<sub>6</sub>D<sub>6</sub>, 298 K):** δ<sub>P</sub> = + 57.1 (d, J<sub>P,P</sub> = 44.5 Hz), + 53.9 (d, J<sub>P,P</sub> = 44.5 Hz). **HRMS (ESI):** *m/z* calc. for [C<sub>25</sub>H<sub>48</sub>P<sub>2</sub>Ir]<sup>+</sup>: 603.286 [M-H]<sup>+</sup>; expt. 603.286 [M-H]<sup>+</sup>. Anal. calcd for C<sub>25</sub>H<sub>49</sub>P<sub>2</sub>Ir (603.8): C, 49.73; H, 8.18; best found: C, 51.05; H, 8.15. These results are outside the range viewed as establishing analytical purity but are provided to illustrate the best values obtained to date. Clean NMR data indicate >95% purity

**[Ir<sup>I</sup>(κ<sup>3</sup>-(CH)=(CH)(CH<sub>2</sub>)PP<sup>t</sup>Bu<sub>3</sub>)(COD)] (±)-2:** C<sub>25</sub>H<sub>47</sub>P<sub>2</sub>Ir, M<sub>w</sub> = 601.8 g/mol): In the glovebox, [Ir(μ-OCH<sub>3</sub>)(COD)]<sub>2</sub> (23 mg, 0.035 mmol, 1 equiv.) was weighed into a 20 mL scintillation vial equipped with a stir bar and dissolved in *ca.* 0.5 mL THF. Then, <sup>t</sup>bape (21 mg, 0.069 mmol, 2 equivs.) was dissolved in *ca.* 1 mL THF and added to the vial while mixing, turning from yellow to

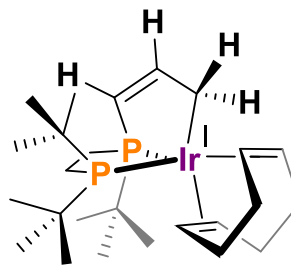

cloudy dark yellow/orange. This reaction was allowed to stir for 5 minutes, resulting in an orange solution, after which volatiles were removed *in vacuo*. The resulting oily solid was dissolved in pentane and filtered using Celite® (the crude yield after this step was 29 mg (69%), with impurities *via* <sup>31</sup>P{<sup>1</sup>H} NMR spectroscopy). Dark yellow crystals suitable for analysis by single crystal X-Ray diffraction were grown from a minimal amount of pentane at -35 °C over the course of 1 week (more material can be obtained from subsequent crystallizations). These crystals can be quickly washed with cold pentane to give (±)-2 in >90% purity ((±)-3 is the impurity) by <sup>31</sup>P{<sup>1</sup>H} NMR spectroscopy (7 mg, 17%).  
<sup>1</sup>H NMR (600 MHz, C<sub>6</sub>D<sub>6</sub>, 298 K): δ<sub>H</sub> = 6.88 (m, 1H; <sup>2</sup>J<sub>H,P</sub> = 47.4 Hz; P-CH on cyclometalated arm), 5.57 (m, 1H; <sup>3</sup>J<sub>H,P</sub> = 12.5 Hz; CH middle of cyclometalated arm), 3.66 (br., 2H; CH COD), 3.31 (br., 2H; CH COD), 3.11 (m, 1H; CH<sub>2</sub> cyclometalated arm), 2.60 (br. m, 4H; CH<sub>2</sub> COD), 2.36 (br. m, 4H; CH<sub>2</sub> COD), 1.84 (m, 1H; J = 17.8 Hz; CH<sub>2</sub> cyclometalated arm), 1.76 – 1.38 (m, 4H, PCH<sub>2</sub>CH<sub>2</sub>P backbone), 1.21 (d, 9H; <sup>3</sup>J<sub>H,P</sub> = 11.6 Hz; <sup>t</sup>Bu CH<sub>3</sub>), 1.19 (d, 9H; <sup>3</sup>J<sub>H,P</sub> = 12.4 Hz; <sup>t</sup>Bu CH<sub>3</sub>), 1.05 (d, 9H; <sup>3</sup>J<sub>H,P</sub> = 10.4 Hz; <sup>t</sup>Bu CH<sub>3</sub>). <sup>13</sup>C{<sup>1</sup>H} NMR (151 MHz, C<sub>6</sub>D<sub>6</sub>, 298 K): δ<sub>C</sub> = 163.4 (d, J<sub>C,P</sub> = 32.9 Hz; CH cyclometalated arm), 125.8 (dd, J<sub>C,P</sub> = 40.0, 1.8 Hz; CH cyclometalated arm), 57.3 (br), 55.7 (br), 37.8 (dd, J<sub>C,P</sub> = 9.9, 4.3 Hz), 36.3 (d, J<sub>C,P</sub> = 5.1 Hz), 35.3 (br), 34.8 (br), 32.5 (d, J<sub>C,P</sub> = 4.1 Hz), 32.1 (dd, J<sub>C,P</sub> = 18.0, 5.0 Hz), 31.9 (d, J<sub>C,P</sub> = 4.2 Hz), 31.8 (d, J<sub>C,P</sub> = 4.1 Hz), 31.3 (d, J<sub>C,P</sub> = 5.1 Hz), 29.3 (dd, J<sub>C,P</sub> = 20.9, 15.1 Hz), 28.3 (d, J<sub>C,P</sub> = 4.4 Hz), 21.7 (d, J<sub>C,P</sub> = 3.9 Hz), 21.4 (dd, J<sub>C,P</sub> = 17.3, 12.6 Hz); some resonances overlapping.  
<sup>31</sup>P{<sup>1</sup>H} NMR (121 MHz, C<sub>6</sub>D<sub>6</sub>, 298 K): δ<sub>P</sub> = + 55.4 (d, J<sub>P,P</sub> = 31.6 Hz), + 46.9 (d, J<sub>P,P</sub> = 31.6 Hz).  
**HRMS (ESI):** *m/z* calc. for [C<sub>25</sub>H<sub>46</sub>P<sub>2</sub>Ir]<sup>+</sup>: 601.270 [M-H]<sup>+</sup>; expt. 601.270 [M-H]<sup>+</sup>. Anal. calcd for C<sub>25</sub>H<sub>47</sub>P<sub>2</sub>Ir (601.8): C, 49.89; H, 7.87; best found: C, 48.80; H, 7.89. These results are outside the range viewed as establishing analytical purity but are provided to illustrate the best values obtained to date. Clean NMR data indicate >95% purity

**[Ir<sup>III</sup>(κ<sup>3</sup>-(CH<sub>2</sub>)(CH)=(CH)PP<sup>t</sup>Bu<sub>3</sub>)(1,2,3,5-η<sup>3</sup>,η<sup>1</sup>-C<sub>8</sub>H<sub>12</sub>)]** (±)-**3**:

C<sub>25</sub>H<sub>47</sub>P<sub>2</sub>Ir, M<sub>w</sub> = 601.8 g/mol): In the glovebox, [Ir(μ-OCH<sub>3</sub>)(COD)]<sub>2</sub> (33 mg, 0.050 mmol, 1 equiv.) was weighed into a 20 mL scintillation vial equipped with a stir bar and dissolved in *ca.* 0.5 mL THF. Next, *t*<sup>b</sup>bape (30 mg, 0.099 mmol, 2 equivs.) was dissolved in *ca.* 1 mL THF and added to the vial

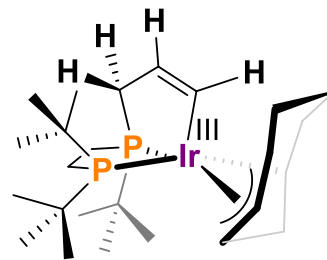

while mixing, slowly going from yellow to cloudy dark yellow/orange. This reaction was allowed to stir for 24 h, resulting in a dark orange/red solution, after which volatiles were removed *in vacuo*. The resulting orange/red oily solid was dissolved in pentane and filtered using Celite® (the crude yield after this step was 47 mg (78%), with impurities *via* <sup>31</sup>P{<sup>1</sup>H} NMR spectroscopy). Light orange crystals of (±)-**3** suitable for analysis by single crystal x-ray diffraction were grown from a minimal amount of pentane at -35 °C over the course of 1 week to give >99% purity *via* <sup>31</sup>P{<sup>1</sup>H} NMR spectroscopy (4 mg, 7%). More material can be obtained from subsequent crystallizations. <sup>1</sup>H NMR (600 MHz, C<sub>6</sub>D<sub>6</sub>, 298 K): δ<sub>H</sub> = 8.45 (m, 1H; Ir-CH on cyclometalated arm), 6.13 (m, 1H; Ir-CH-CH on cyclometalated arm), 4.87 (m, 1H; CH COD), 4.69 (m, 1H; CH COD), 4.07 (m, 1H; CH COD), 3.84 (m, 1H; CH COD), 2.83 (m, 1H; Ir-CH-CH-CH<sub>2</sub> on cyclometalated arm by <sup>1</sup>H-<sup>1</sup>H COSY), 2.58 (m, 1H), 2.47 (m, 2H), 2.04 (m, 1H; Ir-CH-CH-CH<sub>2</sub> on cyclometalated arm by <sup>1</sup>H-<sup>1</sup>H COSY), 1.98-1.17 (m, 9H), 1.13 (d, 9H, <sup>3</sup>J<sub>H,P</sub> = 12.0 Hz; <sup>t</sup>Bu CH<sub>3</sub>), 1.08 (d, 9H, <sup>3</sup>J<sub>H,P</sub> = 11.1 Hz; <sup>t</sup>Bu CH<sub>3</sub>), 0.80 (d, 9H, <sup>3</sup>J<sub>H,P</sub> = 11.0 Hz; <sup>t</sup>Bu CH<sub>3</sub>). <sup>1</sup>H{<sup>31</sup>P} NMR (600 MHz, C<sub>6</sub>D<sub>6</sub>, 298 K): δ<sub>H</sub> = 8.45 (dd, 1H; J<sub>H,H</sub> = 8.3 Hz, J<sub>H,H</sub> = 2.2 Hz; Ir-CH on cyclometalated arm), 6.13 (ddd, 1H; J<sub>H,H</sub> = 8.3 Hz, J<sub>H,H</sub> = 3.6 Hz, J<sub>H,H</sub> = 1.9 Hz; Ir-CH-CH on cyclometalated arm), 4.86 (m, 1H; CH COD), 4.69 (m, 1H; CH COD), 4.06 (m, 1H; CH COD), 3.84 (br. d, 1H; J<sub>H,H</sub> = 14.1 Hz; CH COD), 2.83 (m, 1H; Ir-CH-CH-CH<sub>2</sub> on cyclometalated arm by <sup>1</sup>H-<sup>1</sup>H COSY), 2.58 (m, 1H), 2.47 (m, 2H), 2.04 (dd, 1H; J<sub>H,H</sub> = 15.9 Hz, J<sub>H,H</sub> = 3.63 Hz; Ir-CH-CH-CH<sub>2</sub> on cyclometalated arm by <sup>1</sup>H-<sup>1</sup>H COSY), 1.91 (m, 2H), 1.76 (m, 1H), 1.65 (m, 1H), 1.45 (m, 2H), 1.36 (m, 2H), 1.26 – 1.18 (m, 4H), 1.13 (s, 9H; <sup>t</sup>Bu CH<sub>3</sub>), 1.08 (s, 9H; <sup>t</sup>Bu CH<sub>3</sub>), 0.70 (s, 9H; <sup>t</sup>Bu CH<sub>3</sub>). <sup>13</sup>C{<sup>1</sup>H} NMR (151 MHz, C<sub>6</sub>D<sub>6</sub>, 298 K): δ<sub>C</sub> = 143.9 (dd, J<sub>C,P</sub> = 5.2, 5.1 Hz; Ir-CH on cyclometalated arm), 121.0 (dd, J<sub>C,P</sub> = 14.0, 3.4 Hz; Ir-CH-CH on cyclometalated arm), 94.0 (d, J<sub>C,P</sub> = 3.6 Hz; allyl CH), 56.1 (d, J<sub>C,P</sub> = 6.2 Hz; allyl CH), 39.6 (d, J<sub>C,P</sub> = 1.7 Hz; allyl CH), 39.3 (d, J<sub>C,P</sub> = 1.7 Hz), 38.8 (dd, J<sub>C,P</sub> = 6.3, 2.0 Hz), 36.9 (d, J<sub>C,P</sub> = 6.0 Hz), 34.2 (d, J<sub>C,P</sub> = 5.4 Hz), 33.1 (dd, J<sub>C,P</sub> = 33.1, 1.3 Hz; Ir-CH-CH-CH<sub>2</sub>), 30.9 (d, J<sub>C,P</sub> = 18.2 Hz), 30.8 (d, J<sub>C,P</sub> = 3.6 Hz), 30.0 (d, J<sub>C,P</sub> = 4.5 Hz), 28.4 (dd, J<sub>C,P</sub> = 3.4, 0.8 Hz), 27.7 (d, J<sub>C,P</sub> = 4.2 Hz), 27.5 (dd, J<sub>C,P</sub> = 27.3, 15.7 Hz), 26.0 (dd, J<sub>C,P</sub> = 2.1, 1.1 Hz), 25.2 (dd, J<sub>C,P</sub> = 4.1, 1.5 Hz), 23.5 (dd, J<sub>C,P</sub> = 20.4,

12.5 Hz).  $^{31}\text{P}\{^1\text{H}\}$  NMR (243 MHz,  $\text{C}_6\text{D}_6$ , 298 K):  $\delta_{\text{P}} = +70.1$  (d,  $J_{\text{P,P}} = 2.1$  Hz),  $+35.5$  (d,  $J_{\text{P,P}} = 2.1$  Hz). HRMS (ESI):  $m/z$  calc. for  $[\text{C}_{25}\text{H}_{46}\text{P}_2\text{Ir}]^+$ : 601.270  $[\text{M-H}]^+$ ; expt. 601.270  $[\text{M-H}]^+$ . Anal. calcd for  $\text{C}_{25}\text{H}_{47}\text{P}_2\text{Ir}$  (601.8): C, 49.89; H, 7.87; best found: C, 48.24; H, 8.07. These results are outside the range viewed as establishing analytical purity but are provided to illustrate the best values obtained to date. Clean NMR data indicate >95% purity

**tri-tert-butyl-allyl-diphosphinoethane-d<sub>5</sub>**, (<sup>t</sup>Bu)<sub>2</sub>PCH<sub>2</sub>CH<sub>2</sub>P(<sup>t</sup>Bu)(CD<sub>2</sub>CD<sub>2</sub>), <sup>t</sup>bape-

**d<sub>5</sub>**: C<sub>17</sub>H<sub>31</sub>D<sub>5</sub>P<sub>2</sub>, M<sub>W</sub> = 307.4 g/mol): To a 100 mL two-necked Schlenk flask, was added finely cut dried magnesium turnings (96.4 mg, 3.97 mmol) and cycled onto a Schlenk line. Approximately 20 mL of dry Et<sub>2</sub>O was added to the flask. A reflux condenser was attached to the top neck and a septum to the other.

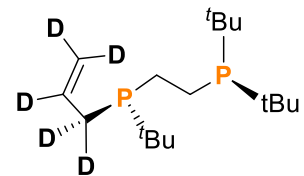

With vigorous stirring, allyl-bromide-d<sub>5</sub> (0.178 mL, 1.98 mmol) was added slowly dropwise over the course of 30 mins, without allowing the solvent to reflux. The reaction was allowed to stir for 2 h, transforming from a clear colorless solution to a colorless solution with off-white precipitate. The solution was then cannula filtered into another 100 mL Schlenk flask and the reaction vessel was washed with 5 mL of Et<sub>2</sub>O. In another 200 mL pear flask, (di-tert-butyl-phosphino)-2-(tert-butyl-iodo-phosphino)ethane, (<sup>t</sup>Bu)<sub>2</sub>PCH<sub>2</sub>CH<sub>2</sub>P(<sup>t</sup>Bu)(I) (377.6 mg, 0.972 mmol) was weighed and dissolved in 80 mL THF. The flask was cycled onto the Schlenk line and cooled to 0 °C. Using a nitrogen purged syringe, the *in-situ* prepared solution of allyl-magnesium bromide-d<sub>5</sub> was added slowly to the flask containing <sup>t</sup>(Bu)<sub>2</sub>PCH<sub>2</sub>CH<sub>2</sub>P(<sup>t</sup>Bu)(I), while stirring over the course of 30 mins. The reaction was then allowed to warm to room temperature and stirred for an additional 2 h (a white precipitate formed). Solvent was removed *in-vacuo* and the reaction vessel was brought into a glovebox. The dried white solid was then washed with 5 x 4 mL of pentane and filtered through a 0.1 μm PTFE syringe filter into a 20 mL scintillation vial. The solvent was removed *in-vacuo* leaving a viscous white oil (260 mg, 87%). *N.B.* this compound was 80% pure by <sup>31</sup>P{<sup>1</sup>H} NMR spectroscopy and was used without further purification. The impurity is the known dimer, (<sup>t</sup>Bu)<sub>2</sub>PCH<sub>2</sub>CH<sub>2</sub>P(<sup>t</sup>Bu)-P(<sup>t</sup>Bu)CH<sub>2</sub>CH<sub>2</sub>P(<sup>t</sup>Bu)<sub>2</sub>.<sup>2</sup> <sup>1</sup>H NMR data as previously reported.<sup>2</sup> <sup>31</sup>P{<sup>1</sup>H} NMR (243 MHz, C<sub>6</sub>D<sub>6</sub>, 298 K): δ<sub>P</sub> = + 34.8 (d, J<sub>P,P</sub> = 29.9 Hz), + 1.62 (d, J<sub>P,P</sub> = 29.9 Hz).

## NMR Data:

Figure S1. ( $\pm$ )-1,  $^1\text{H}$  NMR,  $\text{C}_6\text{D}_6$ , 600 MHz, 298 K.

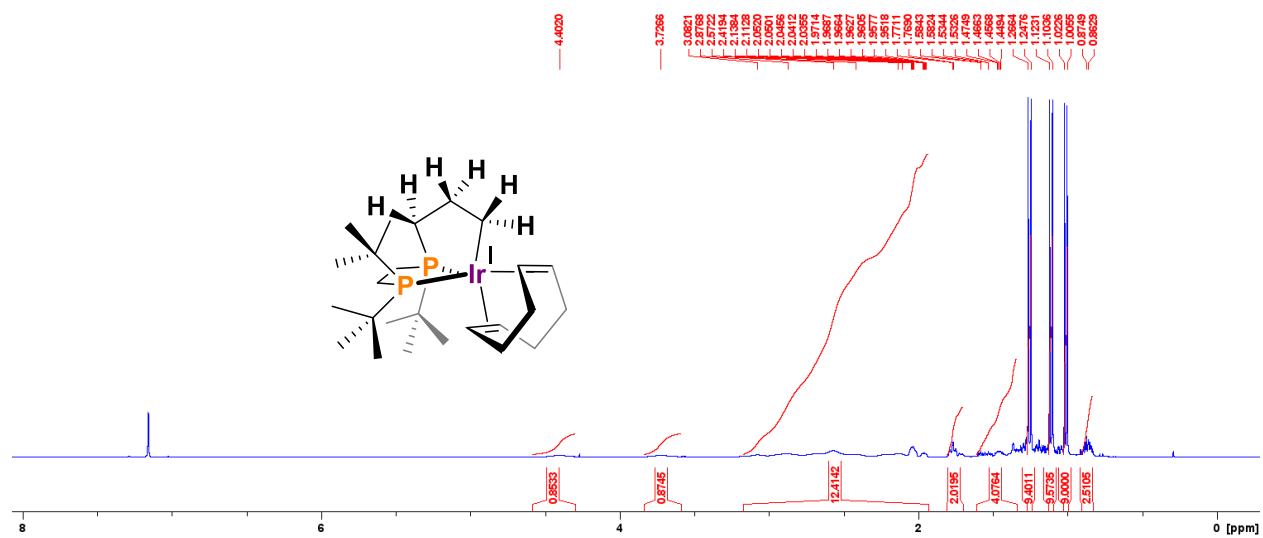

Figure S2. ( $\pm$ )-1,  $^1\text{H}$  NMR (expansion),  $\text{C}_6\text{D}_6$ , 600 MHz, 298 K.

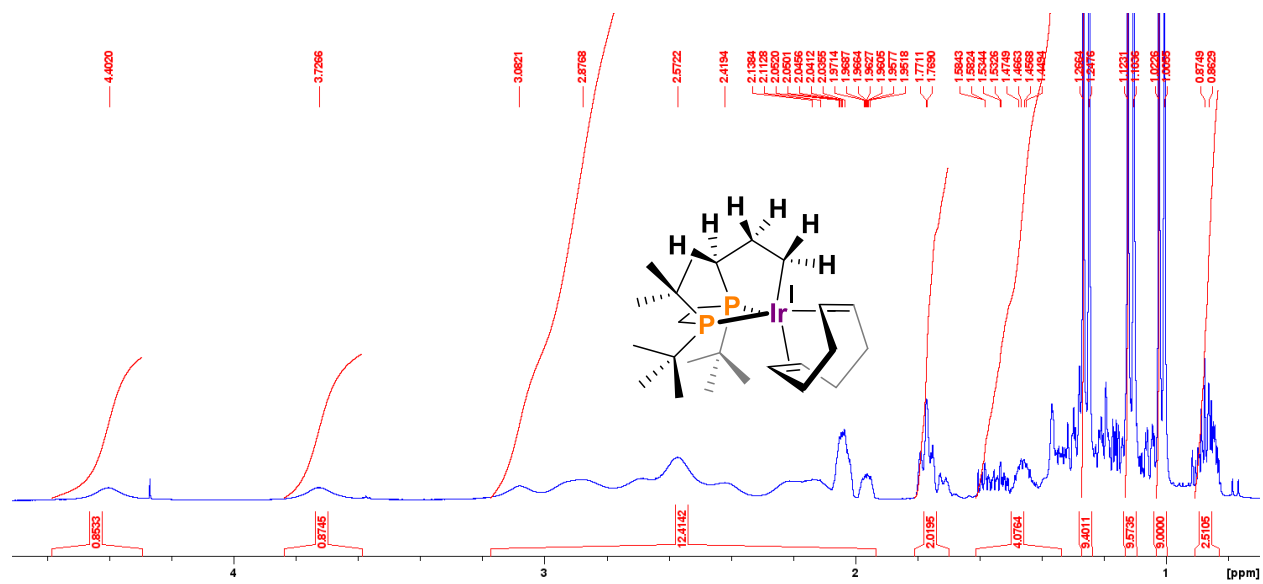



Figure S3. ( $\pm$ )-1,  $^1\text{H}\{^{31}\text{P}\}$  NMR,  $\text{C}_6\text{D}_6$ , 600 MHz, 298 K.

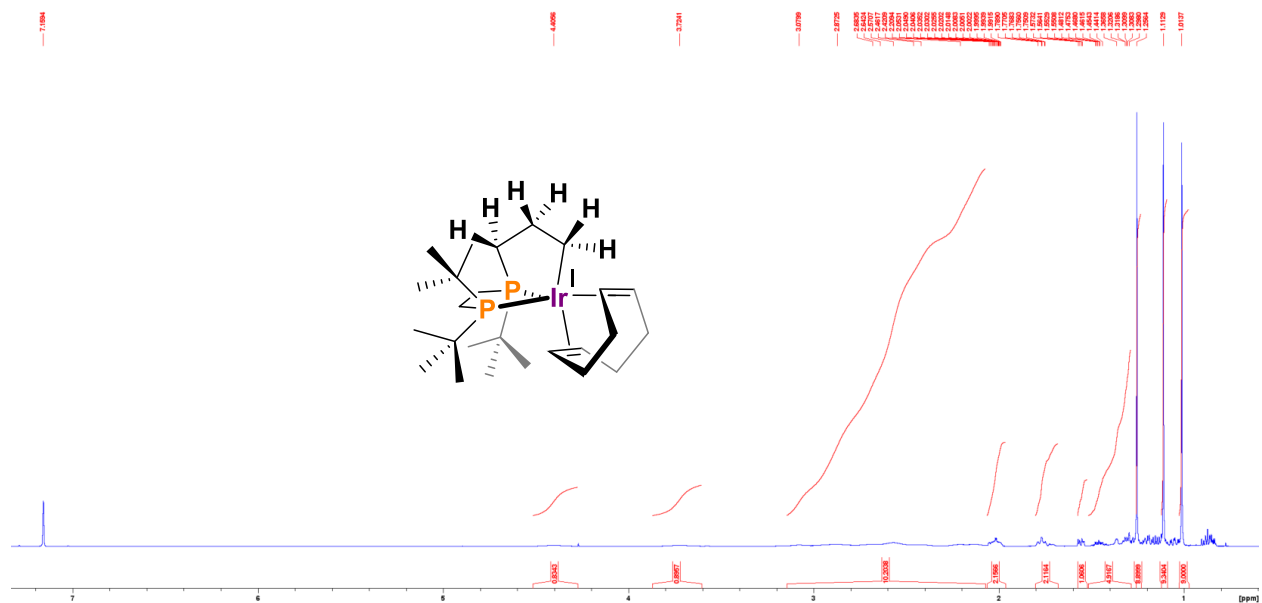

Figure S4. ( $\pm$ )-1,  $^1\text{H}$  (blue)/ $^1\text{H}\{^{31}\text{P}\}$  (red) NMR,  $\text{C}_6\text{D}_6$ , 600 MHz, 298 K.

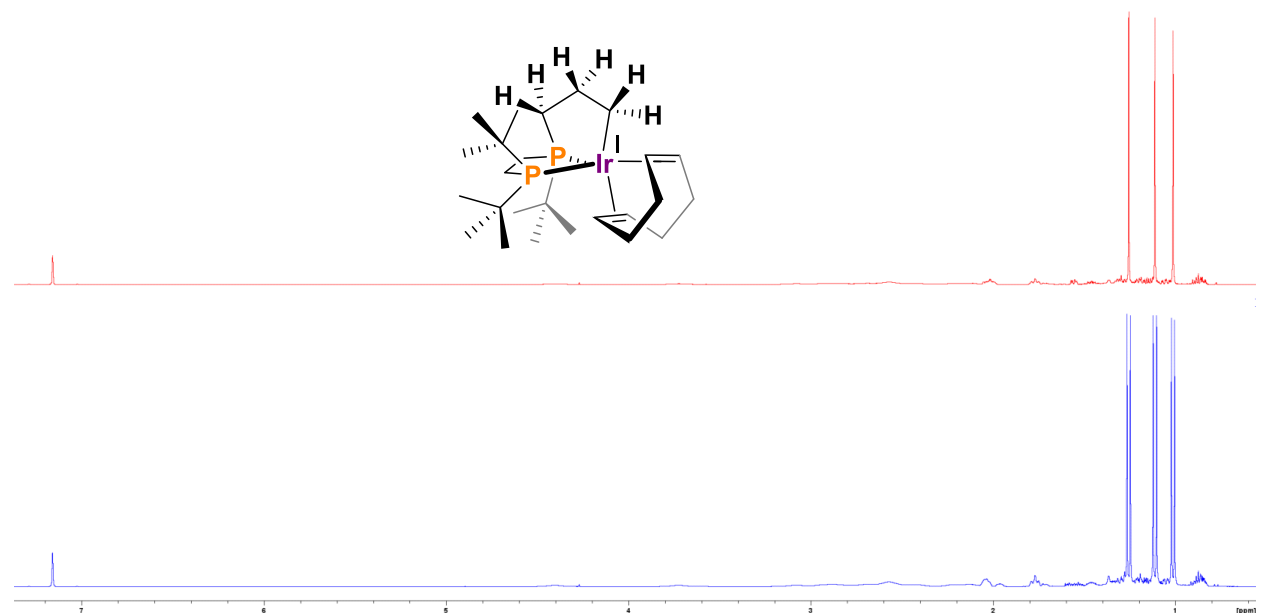

Figure S5. ( $\pm$ )-1,  $^{31}\text{P}\{^1\text{H}\}$  NMR,  $\text{C}_6\text{D}_6$ , 121 MHz, 298 K.

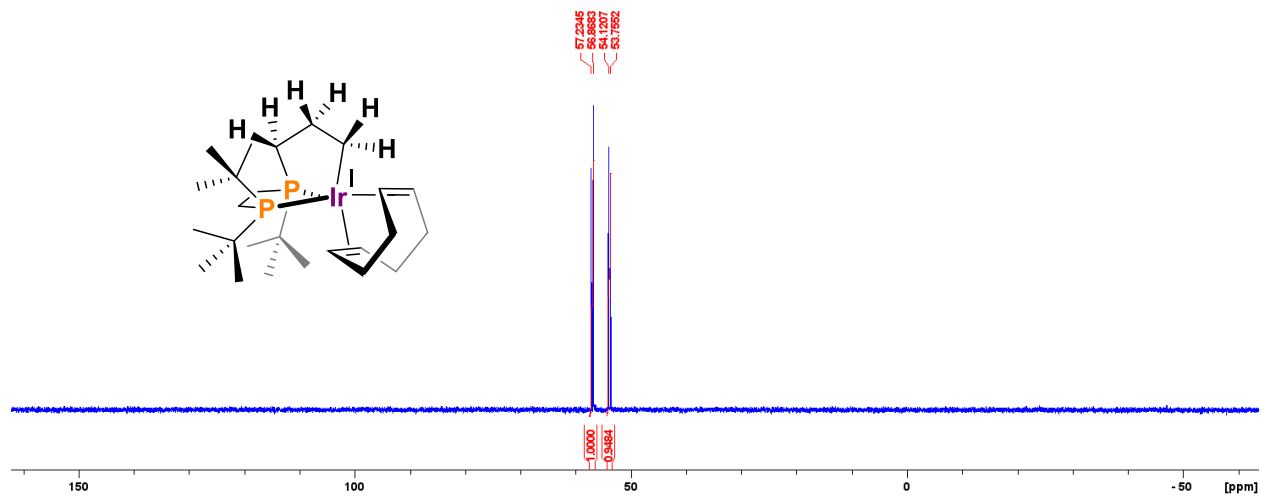

Figure S6. ( $\pm$ )-1,  $^{13}\text{C}\{^1\text{H}\}$  NMR,  $\text{C}_6\text{D}_6$ , 151 MHz, 298 K.

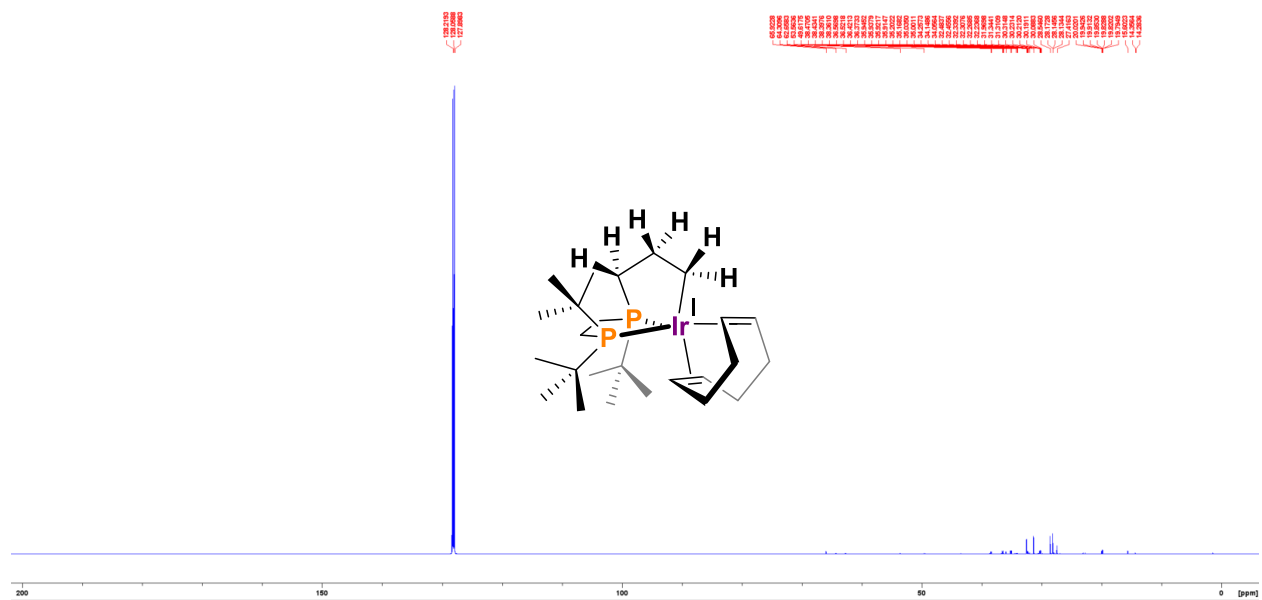

Figure S7. ( $\pm$ )-1,  $^{13}\text{C}\{^1\text{H}\}$  NMR (expansion),  $\text{C}_6\text{D}_6$ , 151 MHz, 298 K.

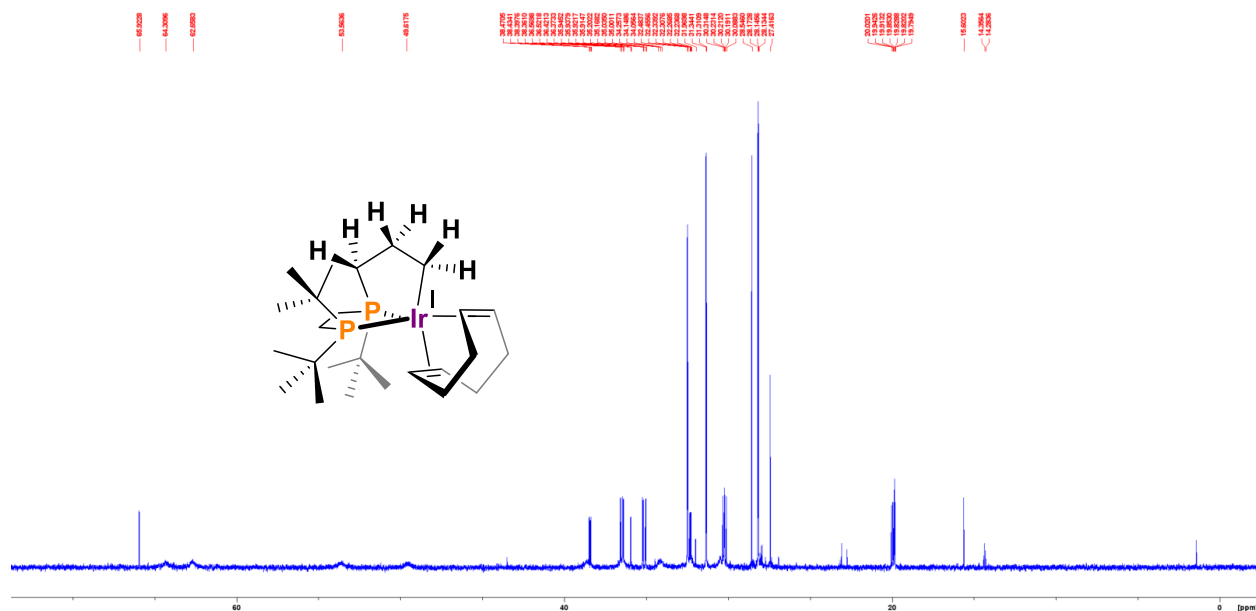

Figure S8. ( $\pm$ )-2,  $^1\text{H}$  NMR,  $\text{C}_6\text{D}_6$ , 600 MHz, 298 K.

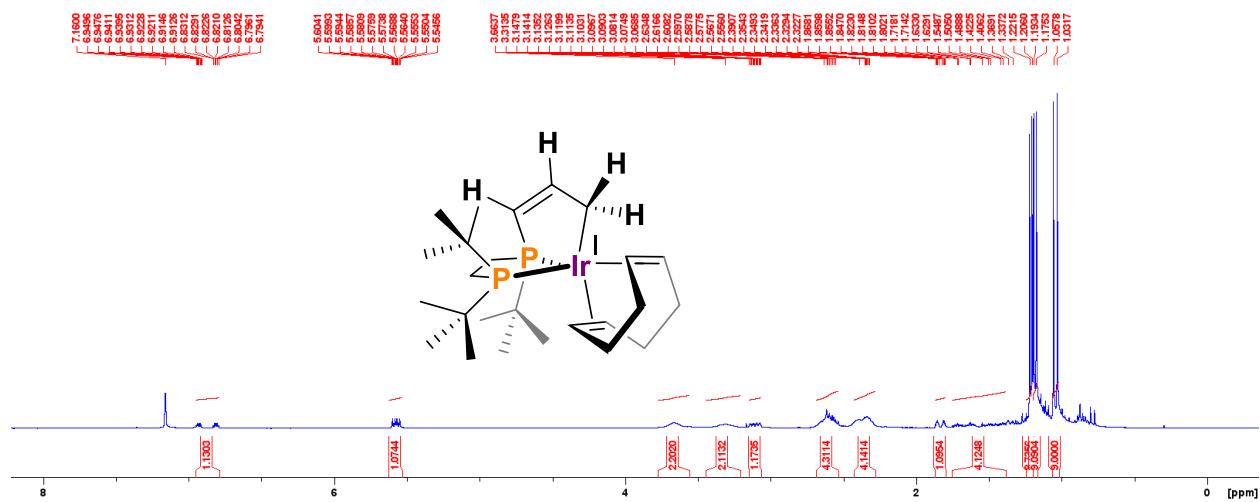

Figure S9. ( $\pm$ )-2,  $^1\text{H}$  NMR (expansion),  $\text{C}_6\text{D}_6$ , 600 MHz, 298 K.

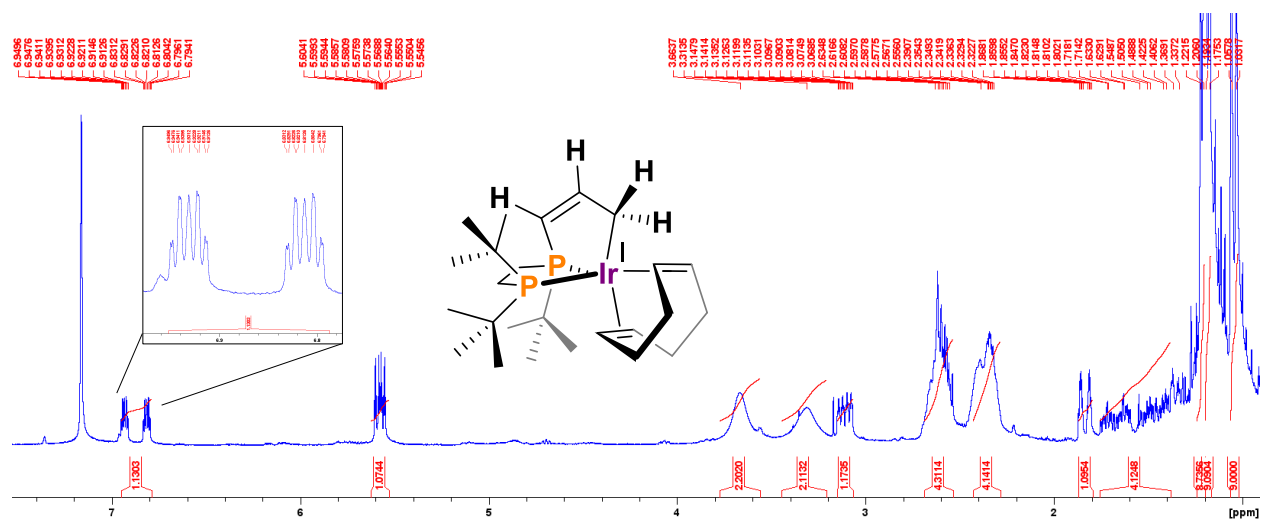

Figure S10. ( $\pm$ )-2,  $^1\text{H}\{^3\text{P}\}$  NMR,  $\text{C}_6\text{D}_6$ , 600 MHz, 298 K.

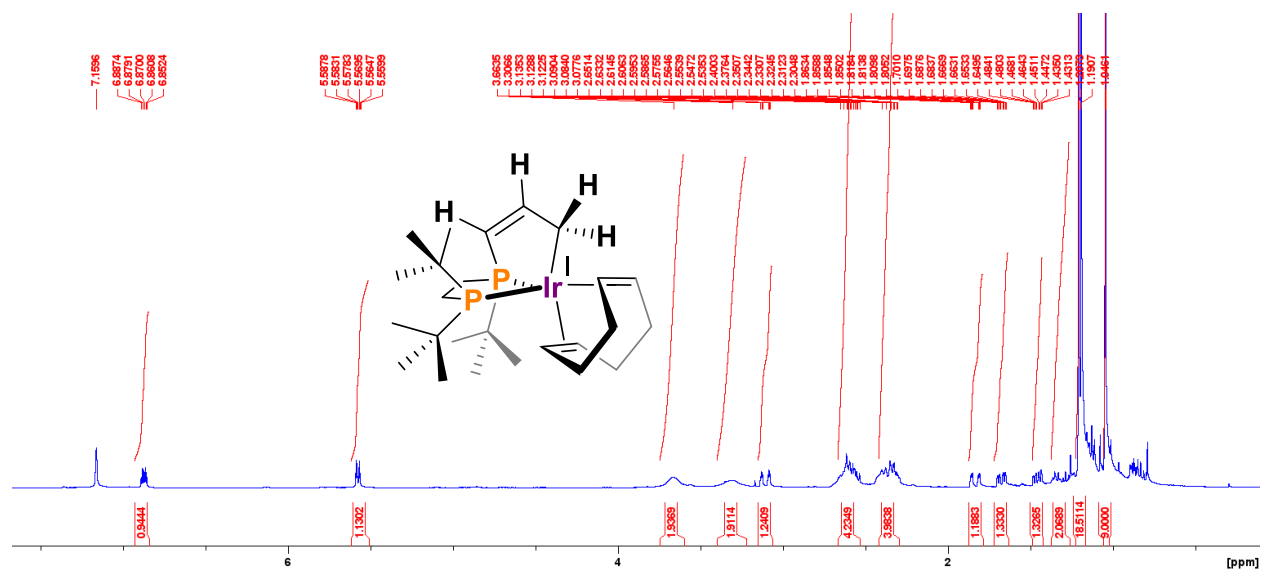

Figure S11. ( $\pm$ )-2,  $^1\text{H}$  (blue)/ $^1\text{H}\{^{31}\text{P}\}$  (red) NMR,  $\text{C}_6\text{D}_6$ , 600 MHz, 298 K.

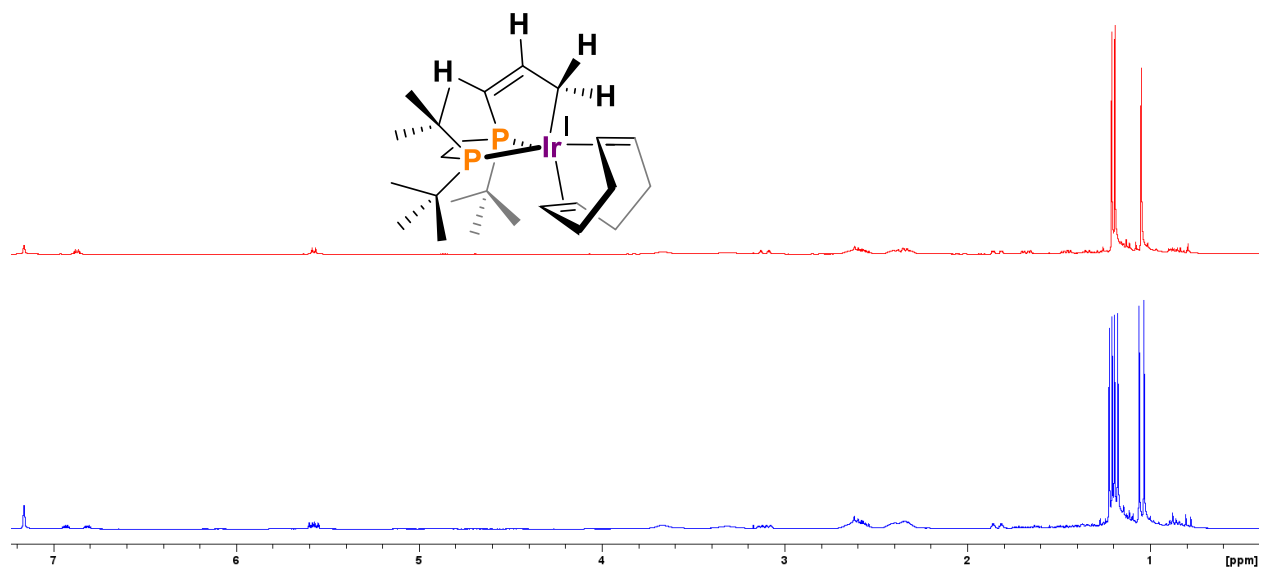

Figure S12. ( $\pm$ )-2,  $^1\text{H}$  (blue)/ $^1\text{H}\{^{31}\text{P}\}$  (red) NMR (expansion),  $\text{C}_6\text{D}_6$ , 600 MHz, 298 K.

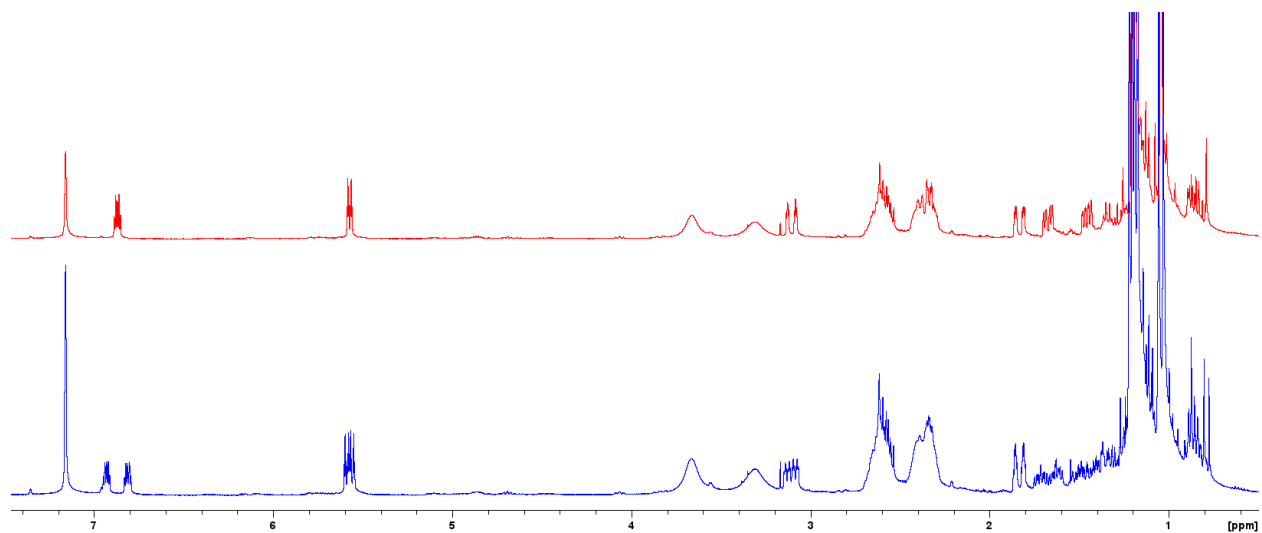

Figure S13. ( $\pm$ )-2,  $^{31}\text{P}\{^1\text{H}\}$  NMR,  $\text{C}_6\text{D}_6$ , 121 MHz, 298 K, [ $\pm$ ]-3  $\delta_{\text{P}} = 69.0/34.4$ ].

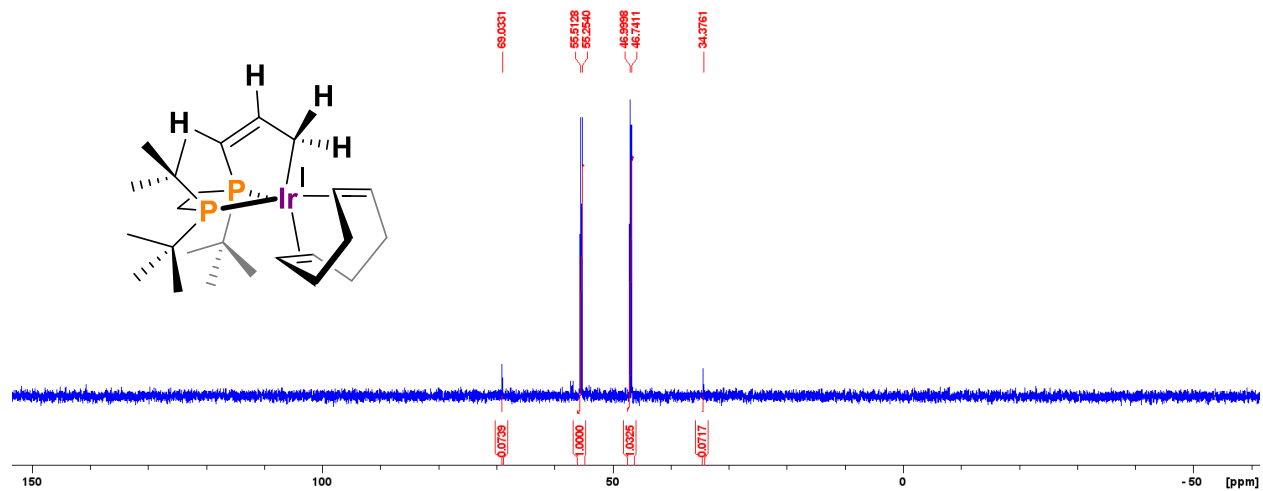

Figure S14. ( $\pm$ )-2,  $^{13}\text{C}\{^1\text{H}\}$  NMR,  $\text{C}_6\text{D}_6$ , 151 MHz, 298 K.

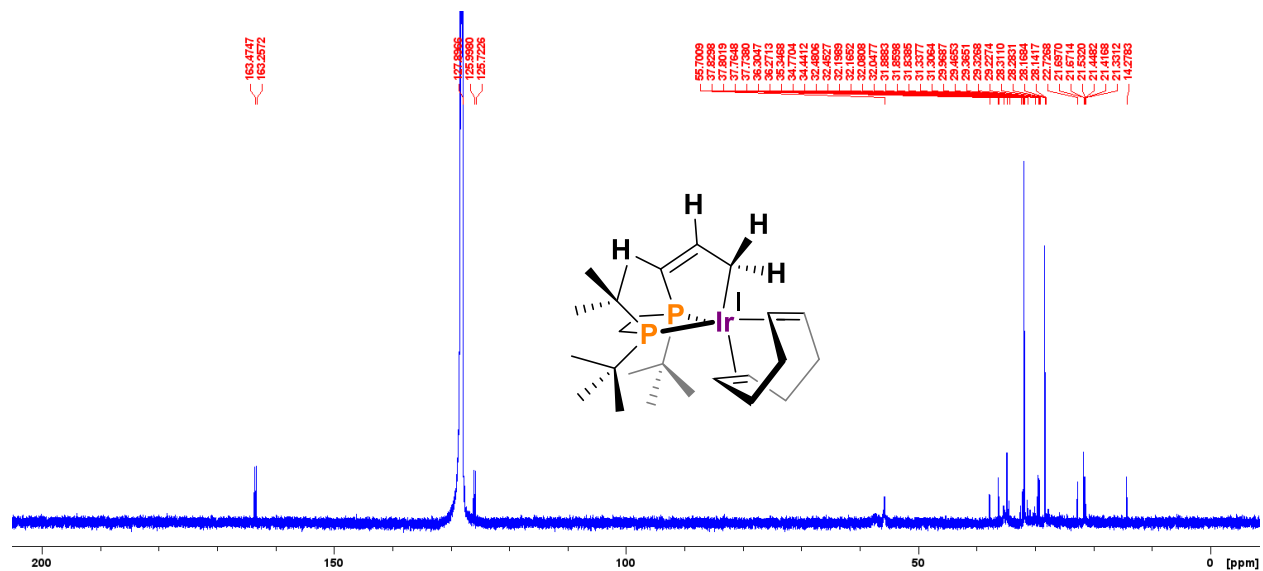

Figure S15. ( $\pm$ )-2,  $^1\text{H}$ - $^1\text{H}$  COSY NMR,  $\text{C}_6\text{D}_6$ , 600 MHz, 298 K.

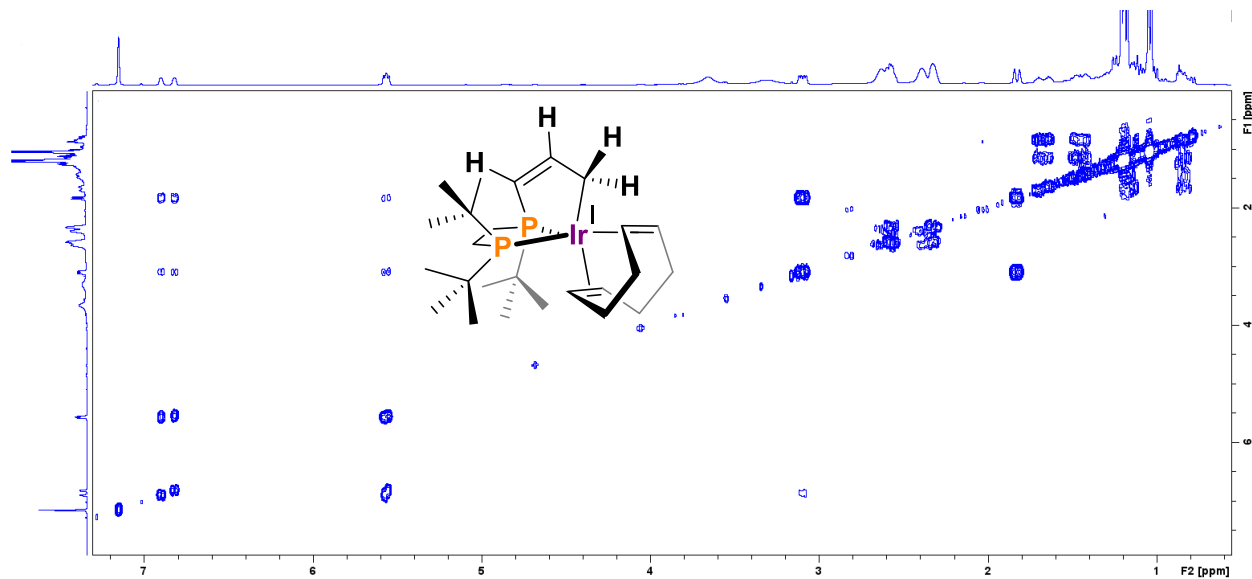

Figure S16. ( $\pm$ )-3,  $^1\text{H}$  NMR,  $\text{C}_6\text{D}_6$ , 600 MHz, 298 K.

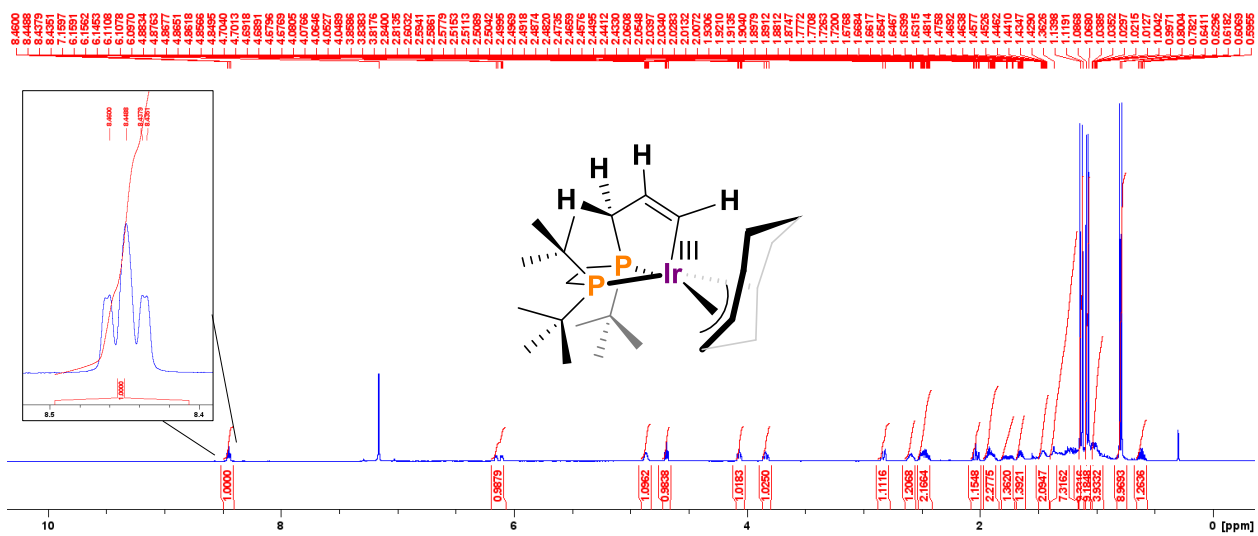

Figure S17. ( $\pm$ )-3,  $^1\text{H}$  NMR (expansion),  $\text{C}_6\text{D}_6$ , 600 MHz, 298 K.

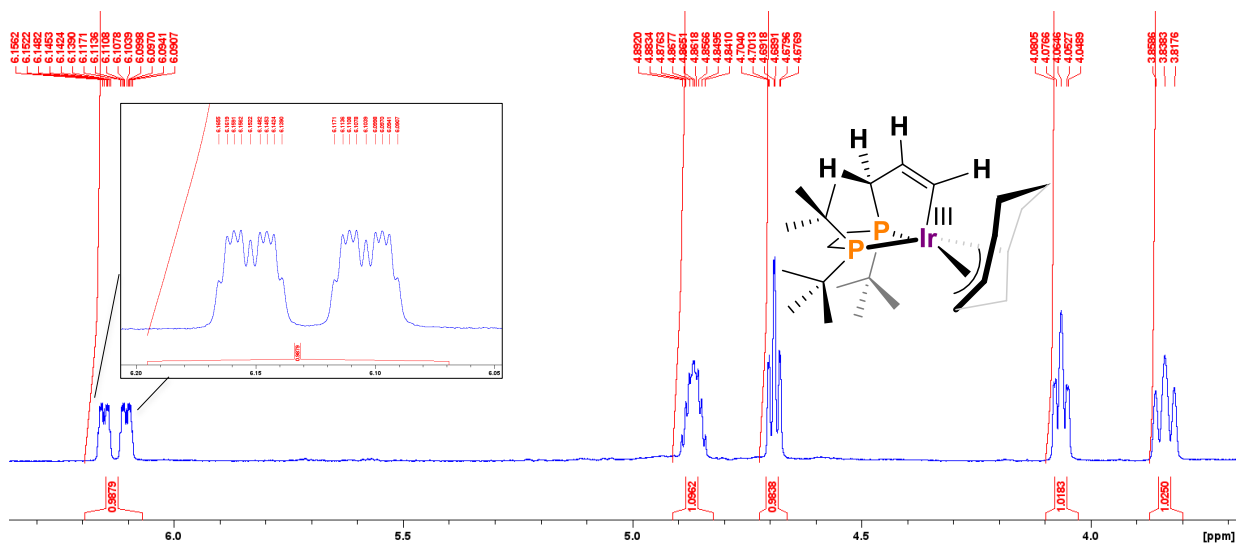

Figure S18. ( $\pm$ )-3,  $^1\text{H}$  NMR (expansion),  $\text{C}_6\text{D}_6$ , 600 MHz, 298 K.

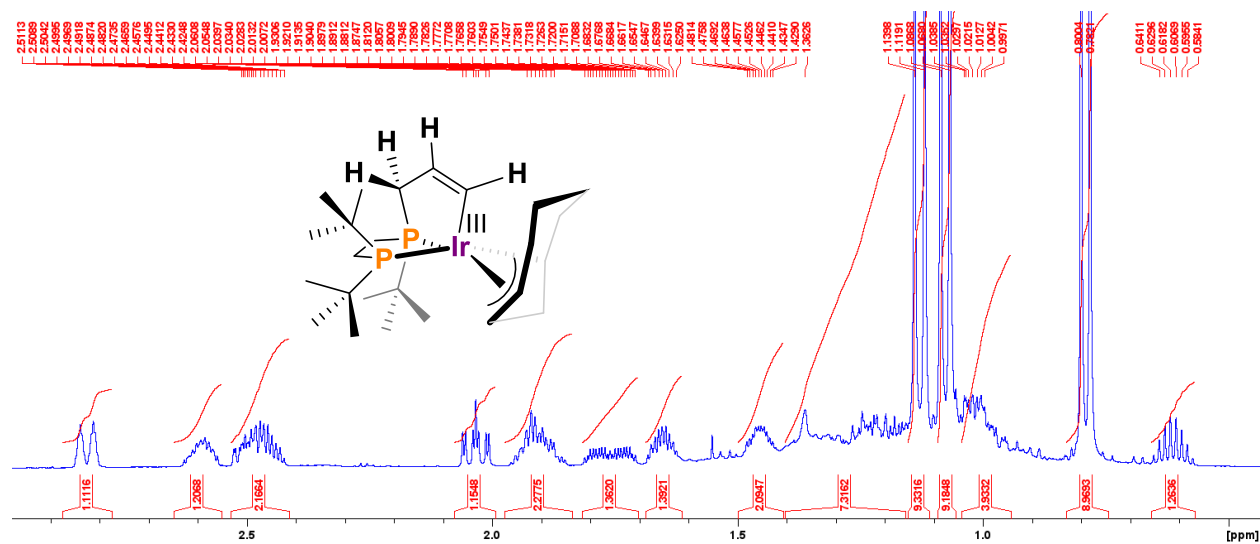



Figure S19. ( $\pm$ )-3,  $^1\text{H}\{^{31}\text{P}\}$  NMR,  $\text{C}_6\text{D}_6$ , 600 MHz, 298 K.

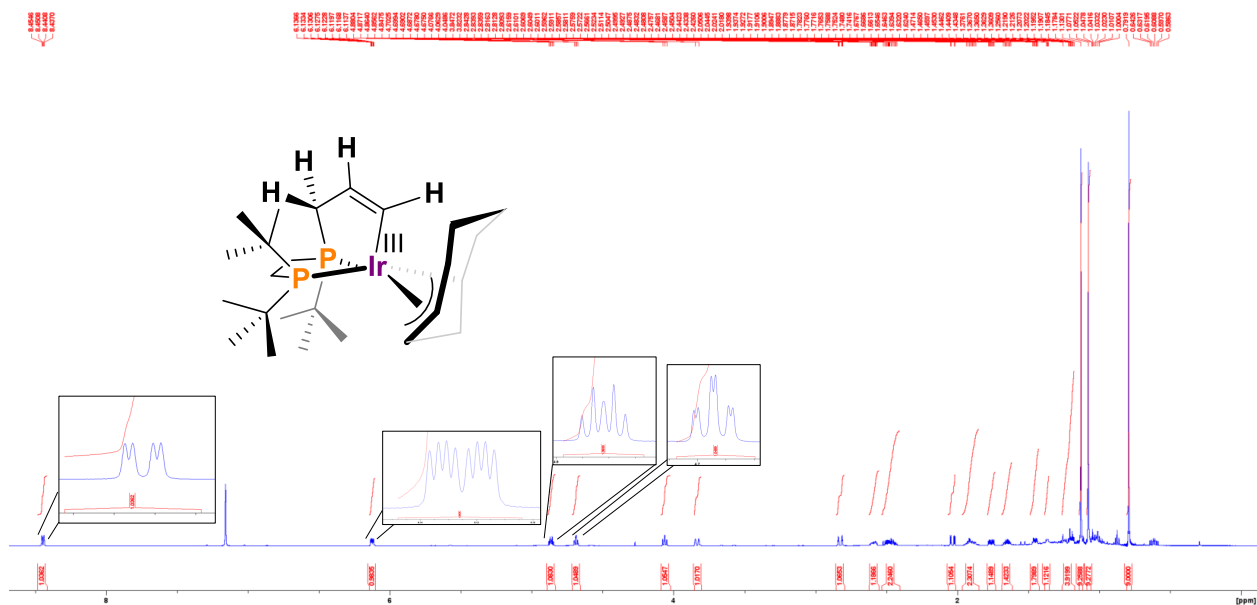

Figure S20. ( $\pm$ )-3,  $^1\text{H}$  (blue)/ $^1\text{H}\{^{31}\text{P}\}$  (red) NMR Stacked,  $\text{C}_6\text{D}_6$ , 600 MHz, 298 K.

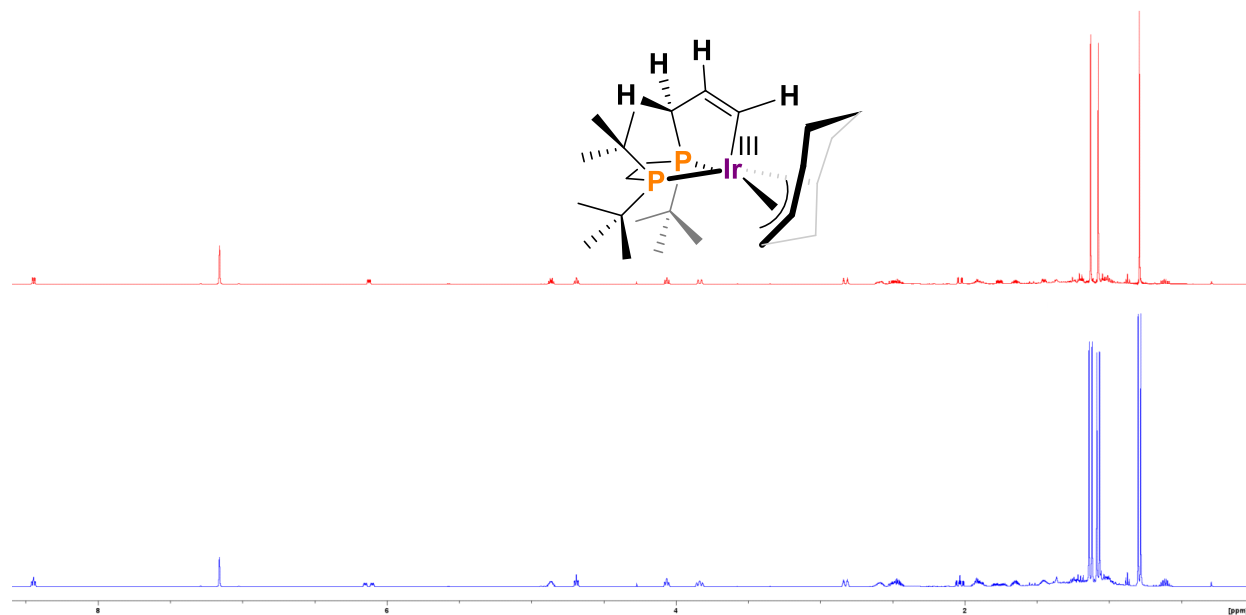

Figure S21. ( $\pm$ )-3,  $^1\text{H}$  (blue)/ $^1\text{H}\{^{31}\text{P}\}$  (red) NMR Stacked (expansion),  $\text{C}_6\text{D}_6$ , 600 MHz, 298 K.

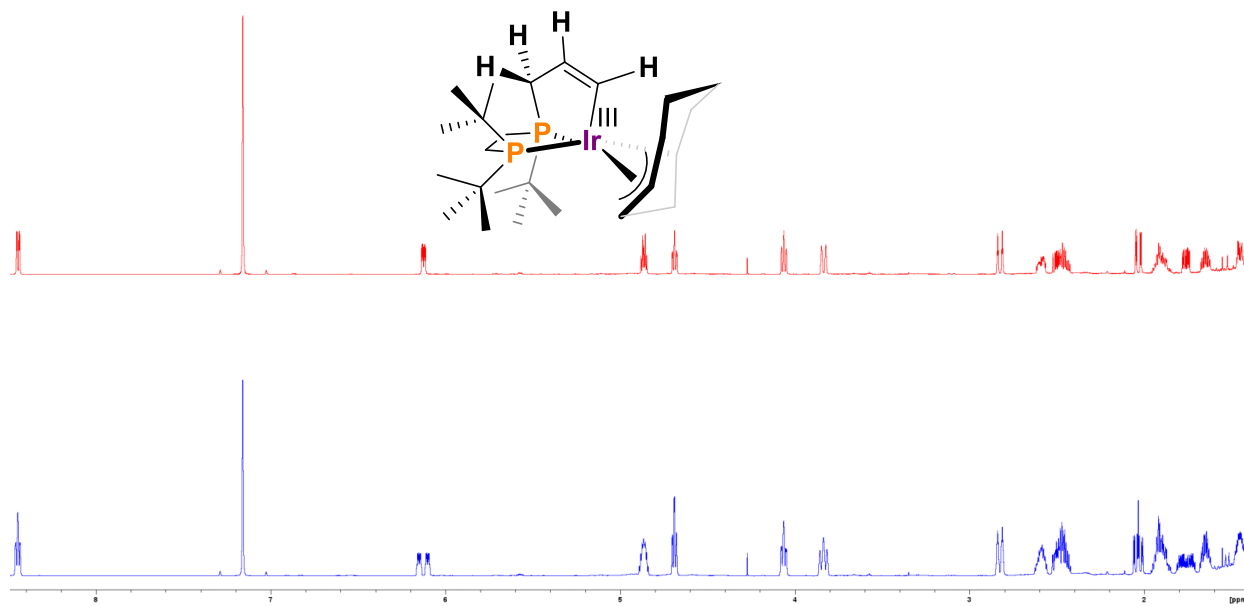

Figure S22. ( $\pm$ )-3,  $^{31}\text{P}\{^1\text{H}\}$  NMR,  $\text{C}_6\text{D}_6$ , 243 MHz, 298 K.

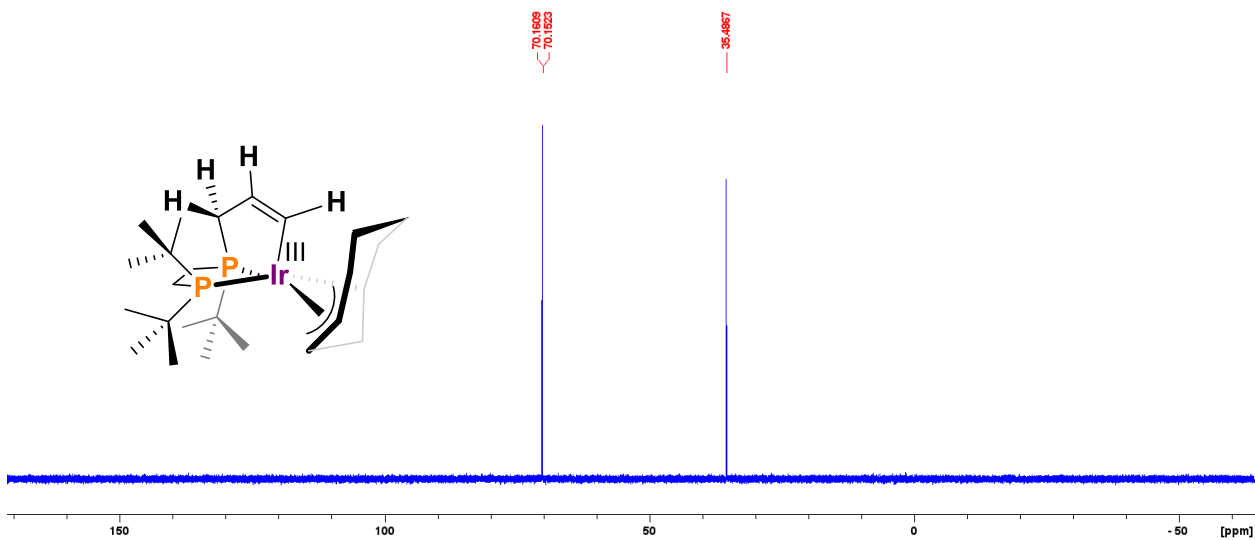

Figure S23. ( $\pm$ )-3,  $^{13}\text{C}\{^1\text{H}\}$  NMR,  $\text{C}_6\text{D}_6$ , 151 MHz, 298 K.

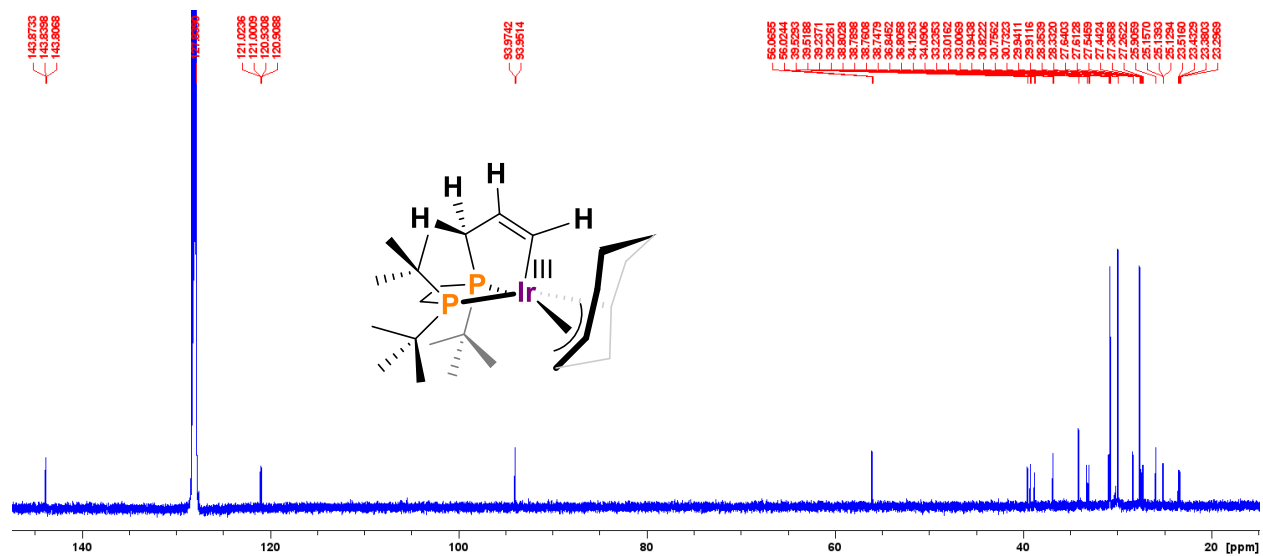

Figure S24. ( $\pm$ )-3,  $^1\text{H}\text{-}^1\text{H}$  COSY NMR,  $\text{C}_6\text{D}_6$ , 600 MHz, 298 K.

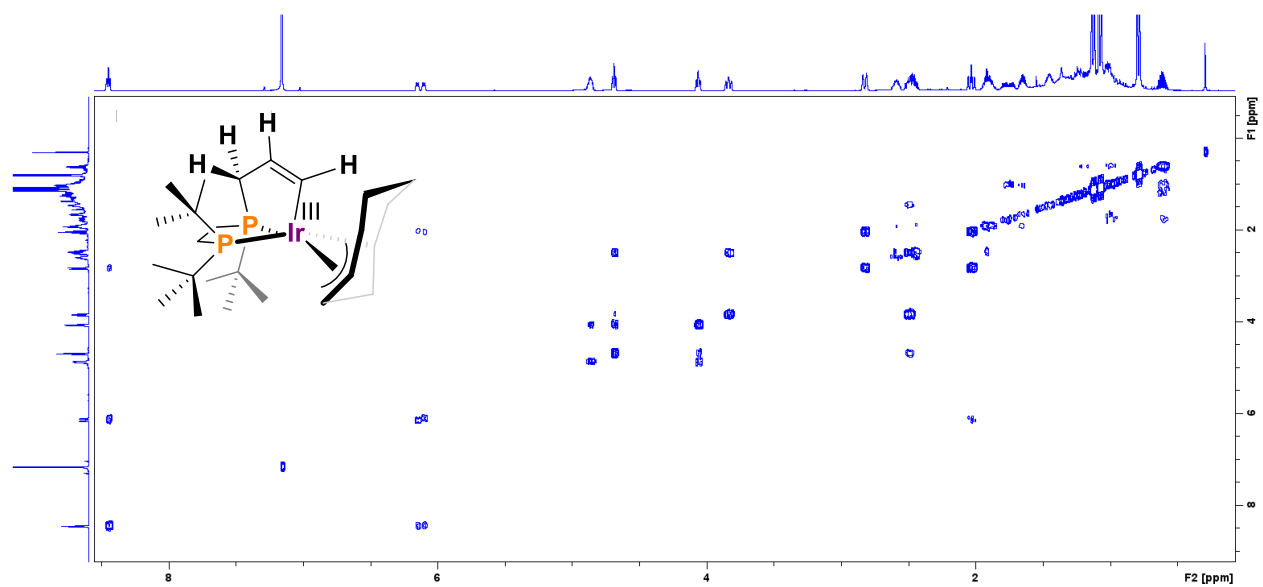

Figure S25. ( $\pm$ )-3,  $^1\text{H}$ - $^{13}\text{C}\{^1\text{H}\}$  HSQC NMR,  $\text{C}_6\text{D}_6$ , 600 MHz, 298 K.

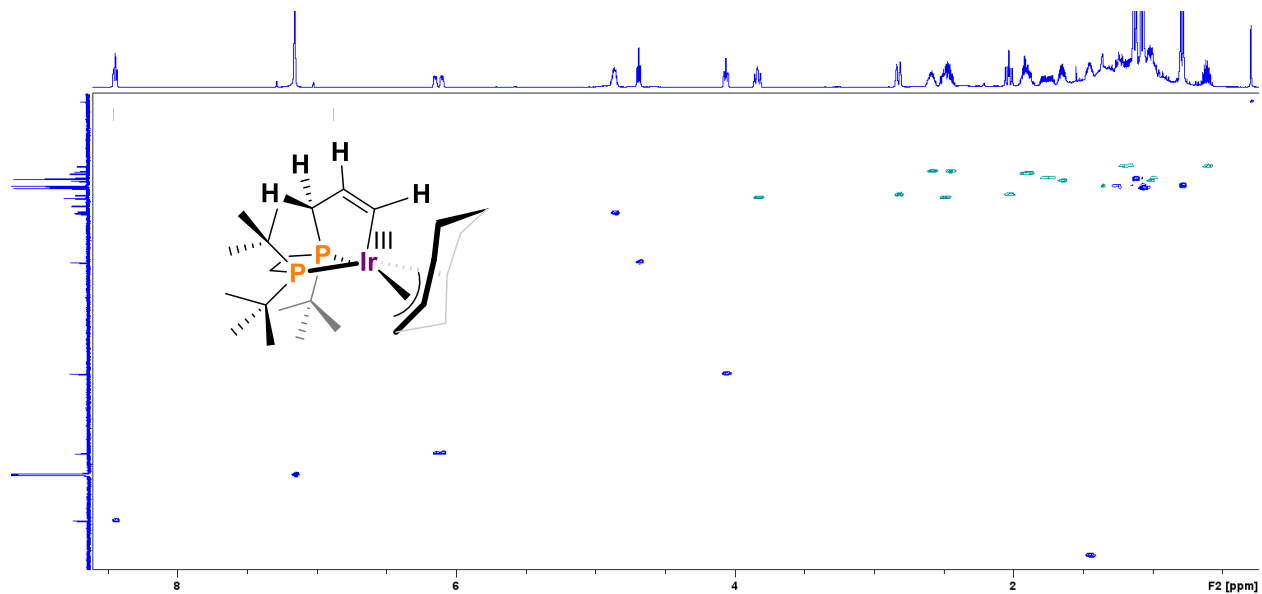

Figure S26.  $t^{\text{b}}\text{bape-d}_5$ ,  $^{31}\text{P}\{^1\text{H}\}$  NMR,  $\text{C}_6\text{D}_6$ , 243 MHz, 298 K (Impurity at  $\delta_{\text{P}} = -5.64$  &  $34.8$  is  $(t^{\text{b}}\text{Bu})_2\text{PCH}_2\text{CH}_2\text{P}(t^{\text{b}}\text{Bu})-\text{P}(t^{\text{b}}\text{Bu})\text{CH}_2\text{CH}_2\text{P}(t^{\text{b}}\text{Bu})_2$ ).

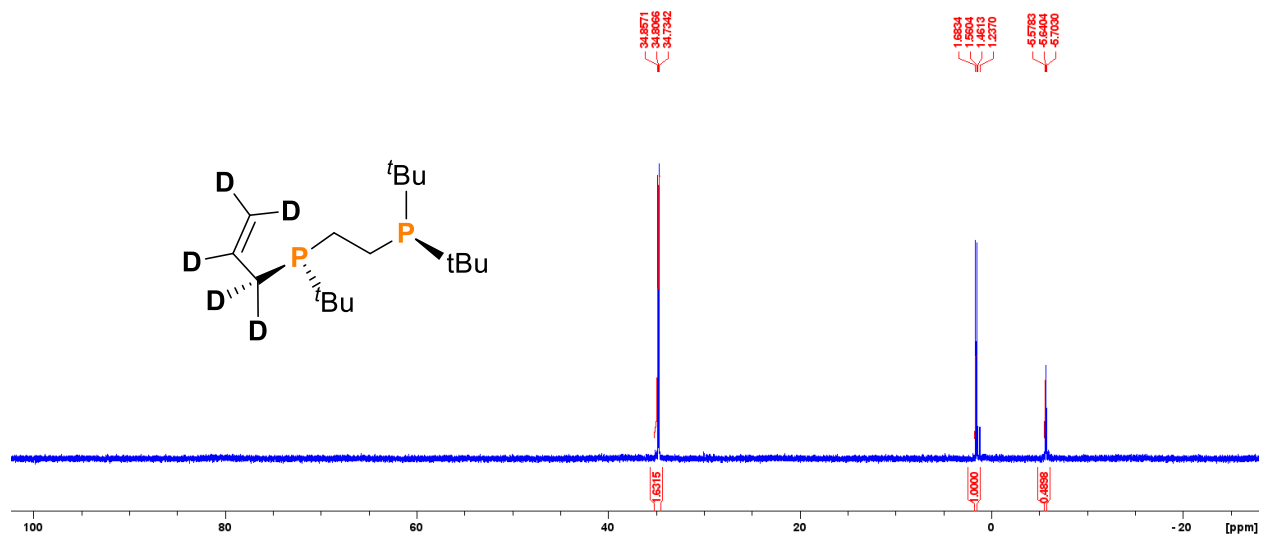

Figure S27.  $t^t\text{bape-d}_5$ ,  $^1\text{H}$  NMR,  $\text{C}_6\text{D}_6$ , 600 MHz, 298 K.

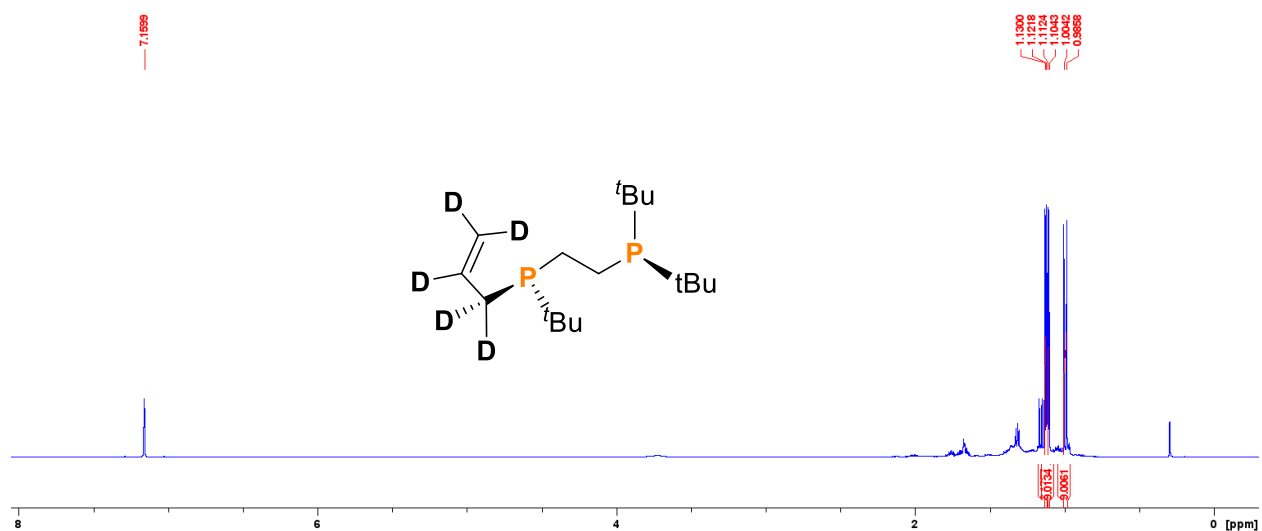

Figure S28.  $t^t\text{bape-d}_5$  (blue) and  $t^t\text{bape}$  (red) overlay,  $^{31}\text{P}\{^1\text{H}\}$  NMR,  $\text{C}_6\text{D}_6$ , 243 MHz, 298 K.

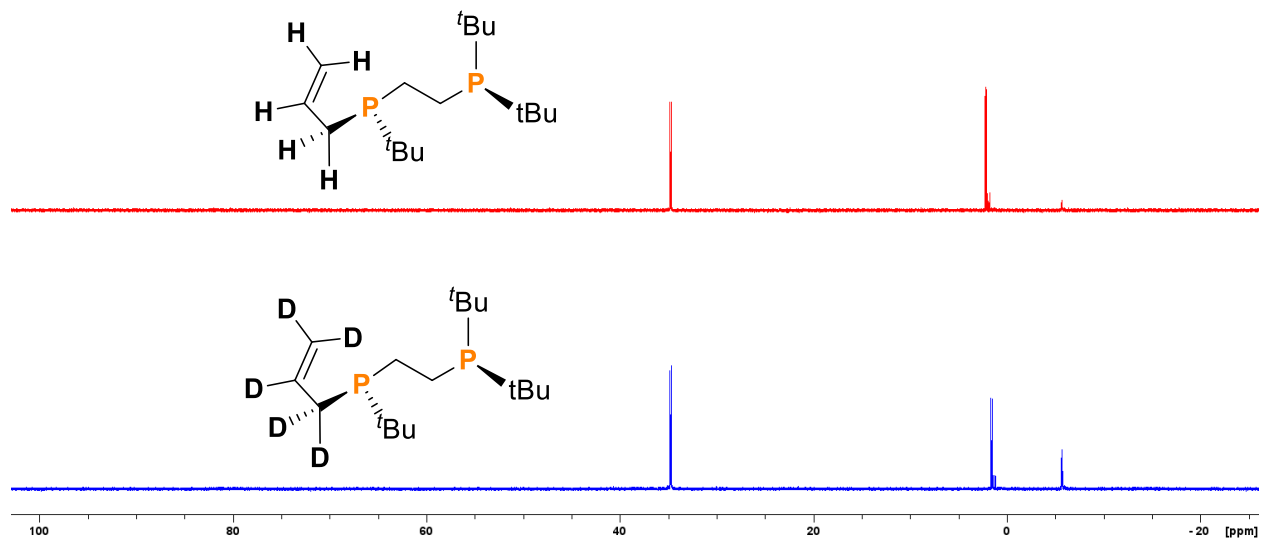

Figure S29. *t*'bape-d<sub>5</sub> (blue) and *t*'bape (red), <sup>1</sup>H NMR, C<sub>6</sub>D<sub>6</sub>, 600 MHz, 298 K.

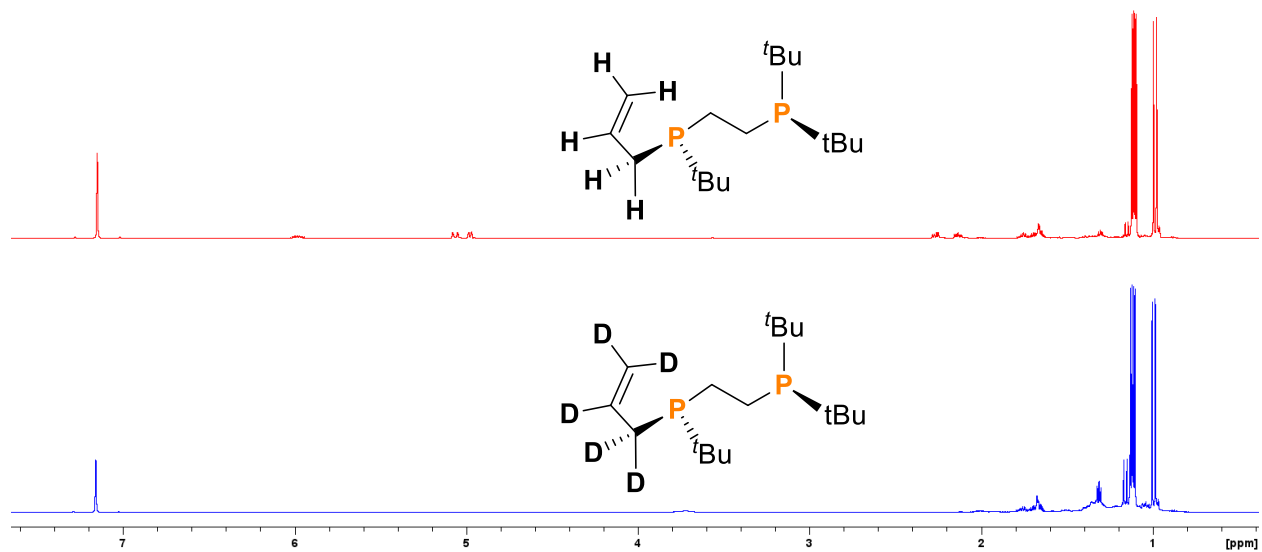

Figure S30. *t*'bape-d<sub>5</sub> (blue) and *t*'bape (red) (expansion), <sup>1</sup>H NMR, C<sub>6</sub>D<sub>6</sub>, 600 MHz, 298 K.

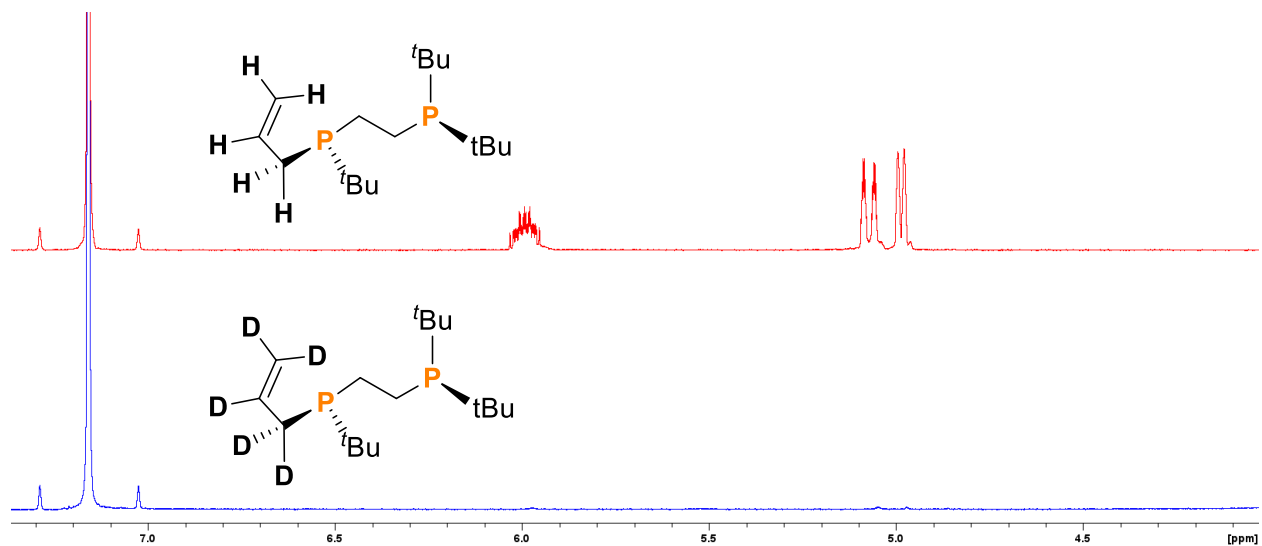

Figure S31. ( $\pm$ )-3-d<sub>4</sub>, <sup>1</sup>H NMR, C<sub>6</sub>D<sub>6</sub>, 600 MHz, 298 K.

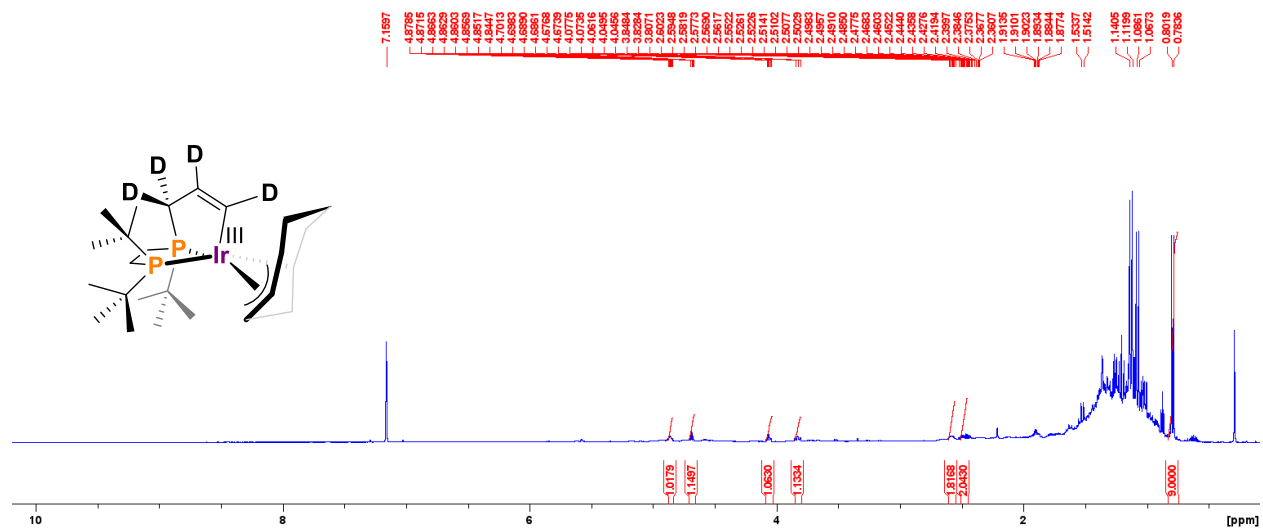

Figure S32. ( $\pm$ )-3-d<sub>4</sub>, <sup>31</sup>P{<sup>1</sup>H} NMR, C<sub>6</sub>D<sub>6</sub>, 243 MHz, 298 K.

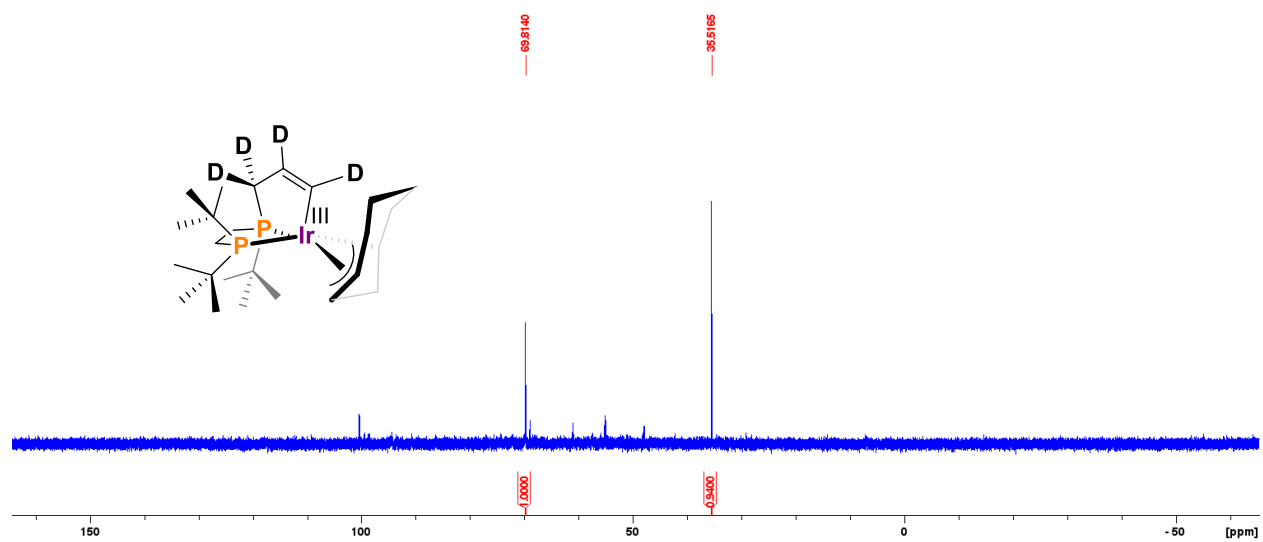

Figure S33. ( $\pm$ )-3-d<sub>4</sub> (blue) and ( $\pm$ )-3 (red) overlay, <sup>31</sup>P{<sup>1</sup>H} NMR, C<sub>6</sub>D<sub>6</sub>, 243 MHz, 298 K.

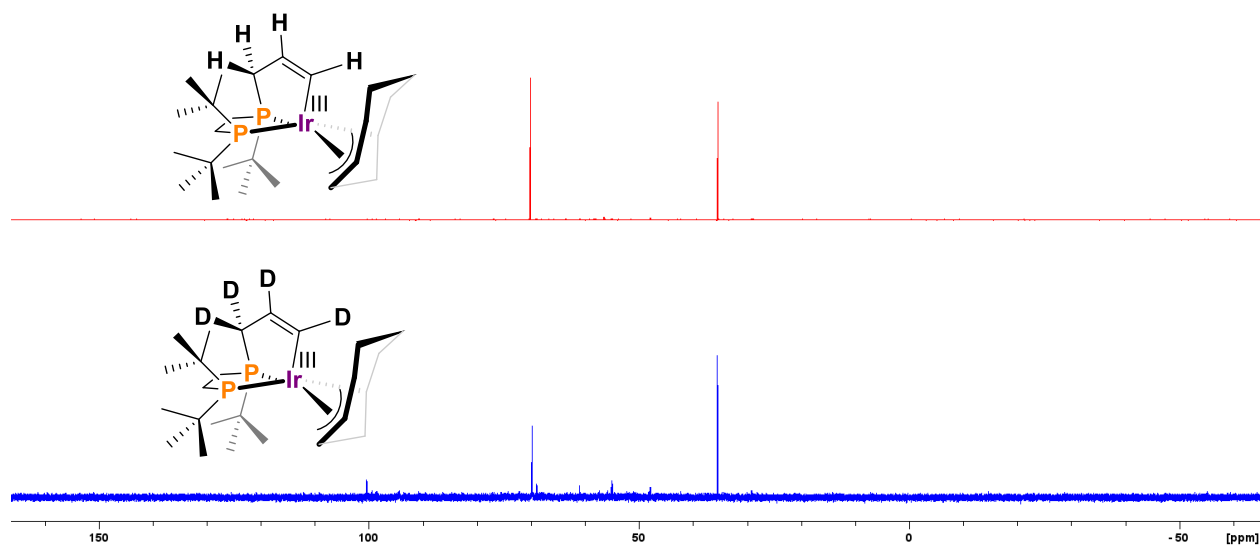

Figure S34. ( $\pm$ )-3-d<sub>4</sub> (blue) and ( $\pm$ )-3 (red) overlay, <sup>1</sup>H NMR, C<sub>6</sub>D<sub>6</sub>, 600 MHz, 298 K. (Signals at  $\delta_{\text{H}} = 8.45, 6.13, 2.83,$  and  $2.04$  ppm are absent).

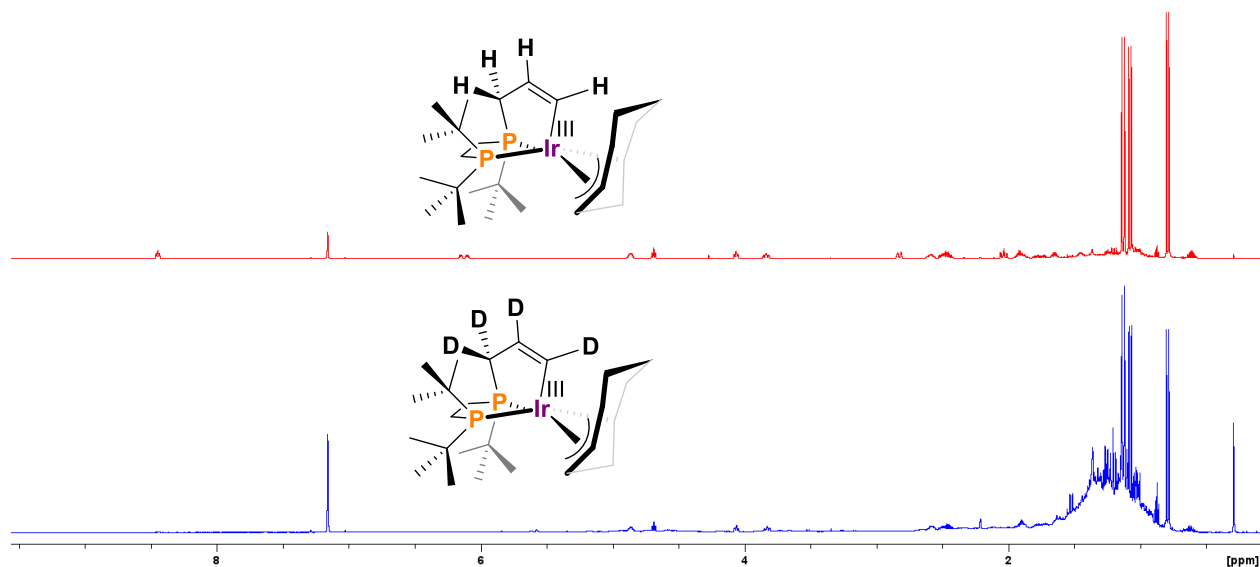



**Figure S35.** ( $\pm$ )-3-d<sub>4</sub> (blue) and ( $\pm$ )-3 (red) overlay, <sup>1</sup>H NMR, C<sub>6</sub>D<sub>6</sub>, 600 MHz, 298 K. (Signals at  $\delta_{\text{H}}$  = 8.45, 6.13, 2.83, and 2.04 ppm are absent – highlighted below).

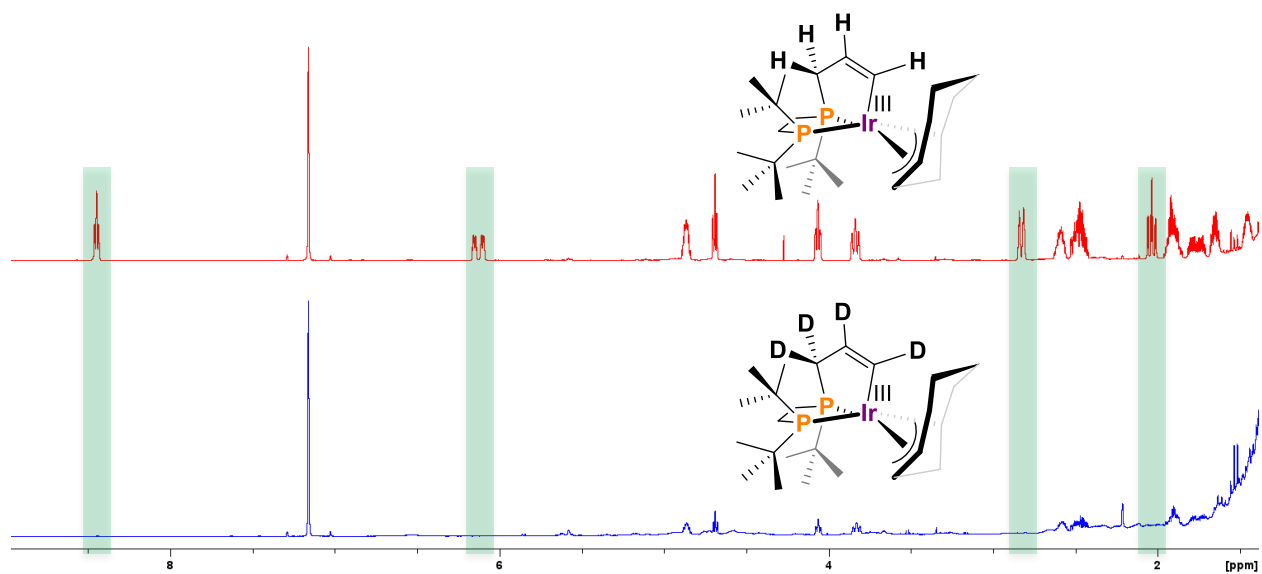

## IR Data

**Figure S36. ( $\pm$ )-1, FT-IR (ATR), thin film from evaporated  $C_6D_6$ .**

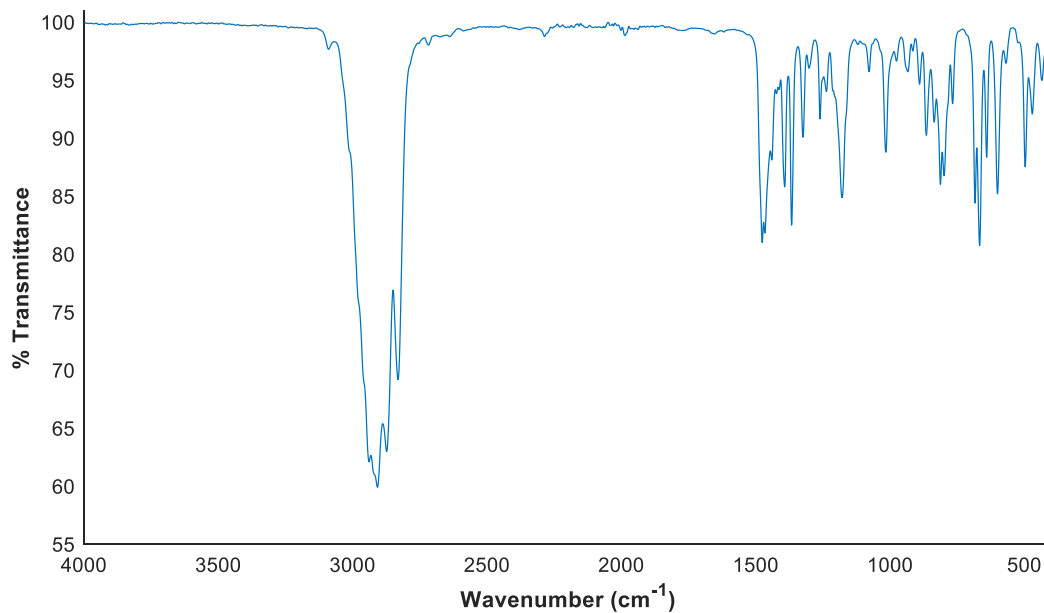

**Figure S37. ( $\pm$ )-2, FT-IR (ATR), thin film from evaporated  $C_6D_6$ .**

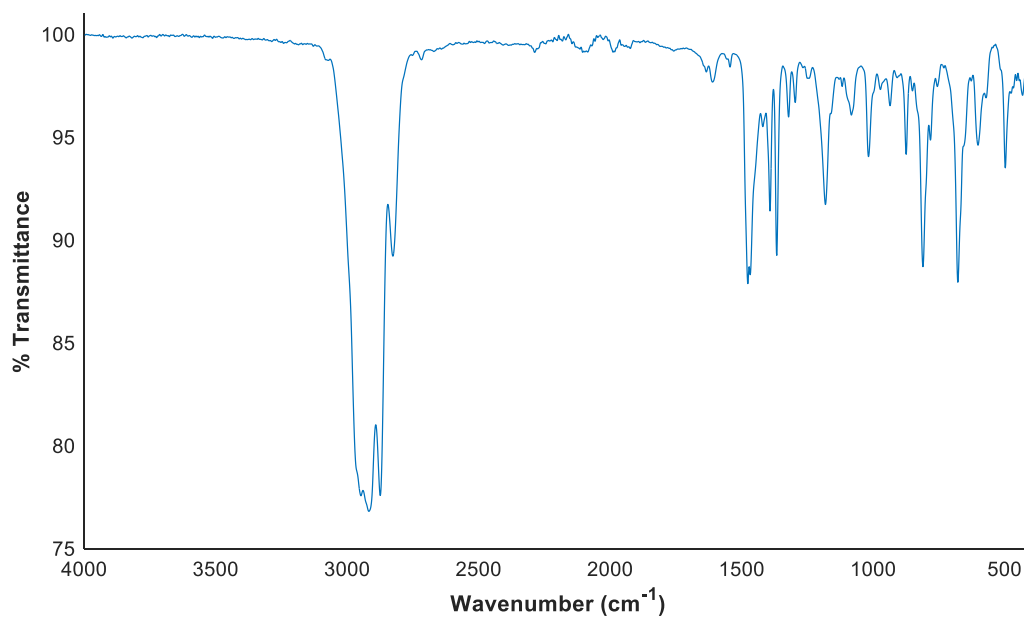

Figure S38. ( $\pm$ )-**3**, FT-IR (ATR), thin film from evaporated C<sub>6</sub>D<sub>6</sub>.

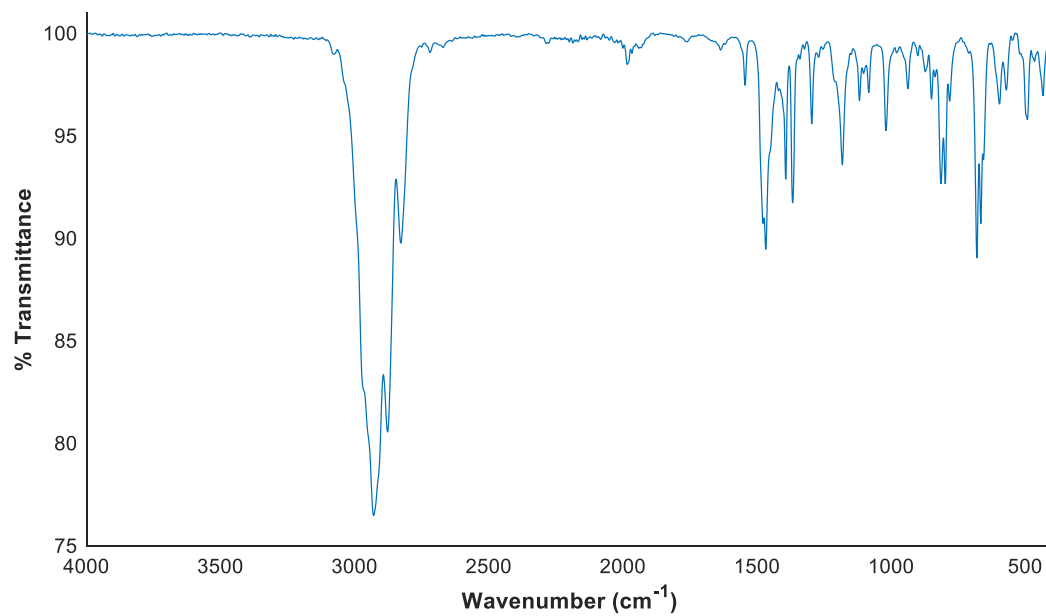

Figure S39. [Ir( $\mu$ -OMe)COD]<sub>2</sub>, FT-IR (ATR), thin film from evaporated C<sub>6</sub>D<sub>6</sub>

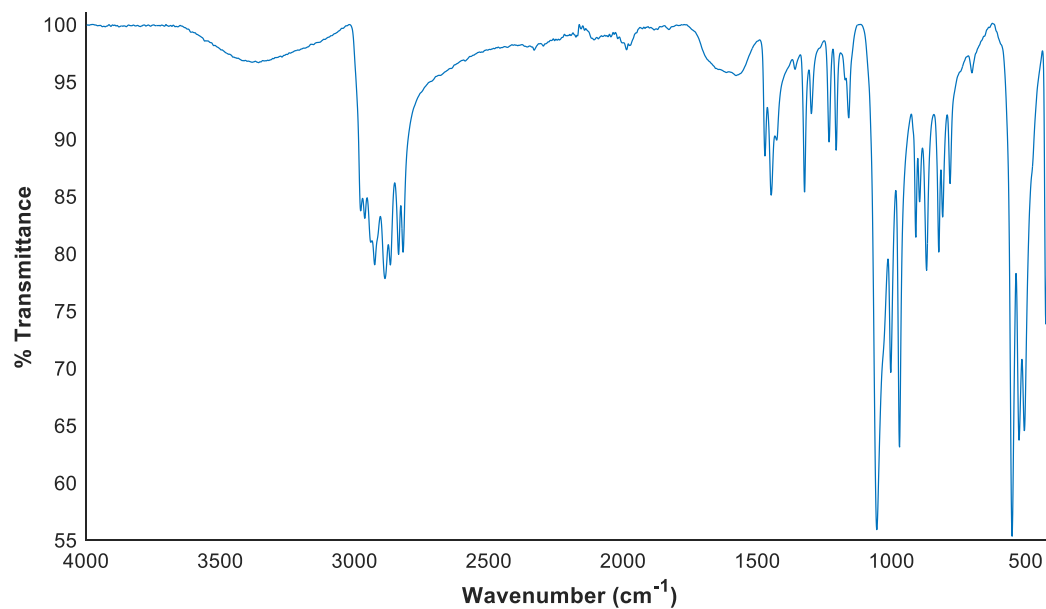

Figure S40. *t*<sup>t</sup>bape, FT-IR (ATR), thin film from evaporated C<sub>6</sub>D<sub>6</sub>.

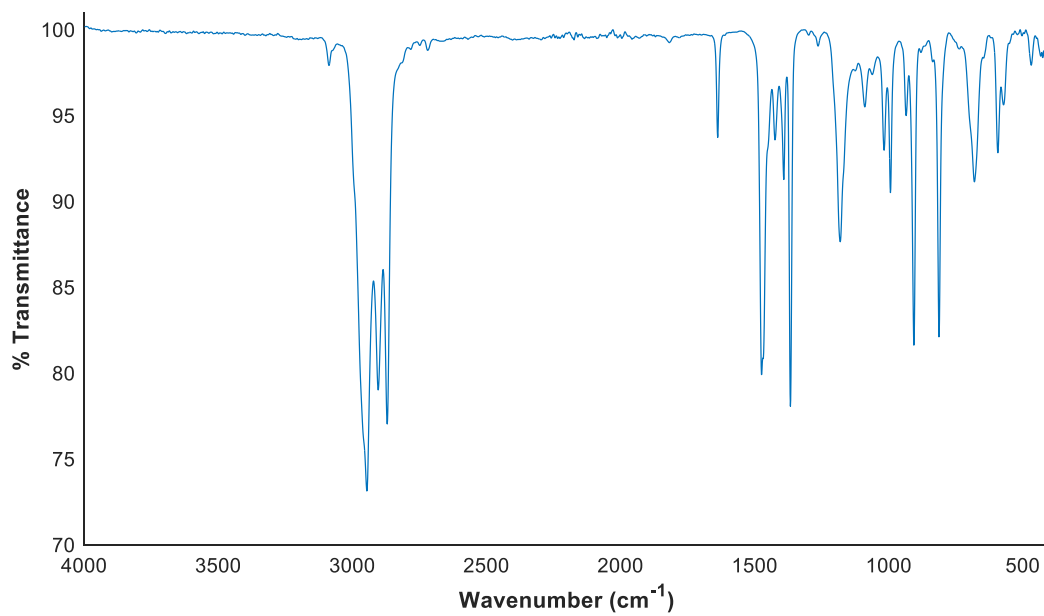

Figure S41. *t*<sup>b</sup>bpe, FT-IR (ATR), thin film from evaporated C<sub>6</sub>D<sub>6</sub>.

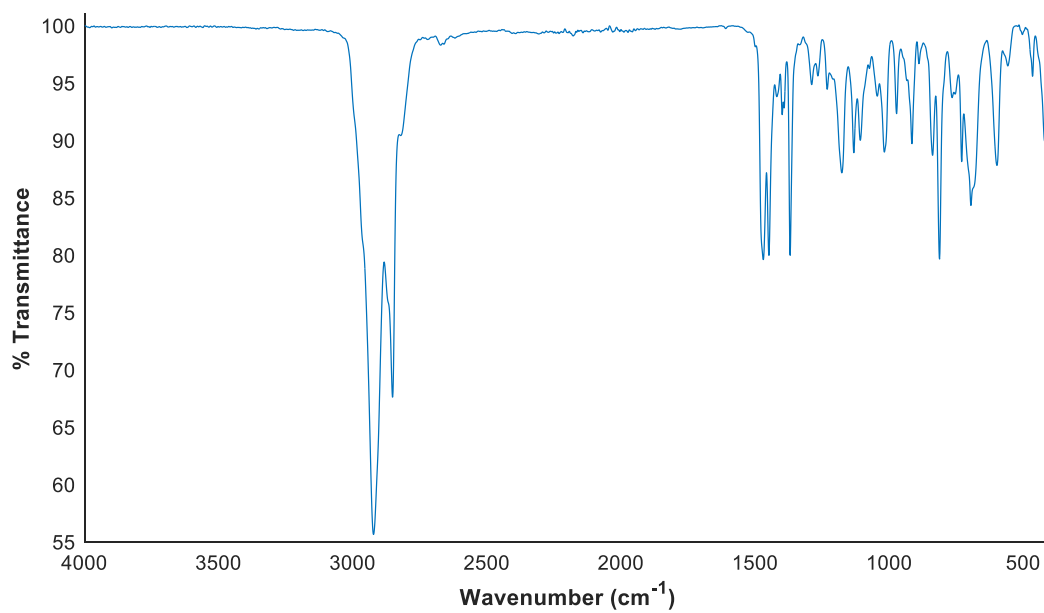

## **Computational details**

All calculations were performed using version 5.0.3 of the ORCA computational package.<sup>3</sup> All geometry optimizations and frequency calculations were performed at the PBE0-D3(BJ)/def2-TZVP level of theory.<sup>4</sup> The SARC-ZORA-TZVP basis set was used for iridium (along with the *SARC/J* auxiliary basis). The RIJCOSX approximation was used to enhance computational efficiency, along with the auxiliary basis *def2/J*.<sup>5</sup> Convergence criteria were met using the *defgrid2* integral grid size. Frequency calculations (*Freq*) were performed to confirm that each optimized geometry was a true minimum indicated by the absence of imaginary frequencies. A Universal Solvation Model (SMD) of benzene was used to calculate the thermodynamic parameters.

Accurate electronic energies were determined using CCSD(T) at the DLPNO-CCSD(T)/def2-TZVP level of theory.<sup>6</sup> The RIJCOSX approximation was used to enhance computational efficiency, along with a *def2/J* auxiliary basis set.<sup>7</sup> As well, a *def2-TZVP/C* auxiliary basis set was used.<sup>8</sup>

To obtain accurate thermochemical information, the final Gibbs free energies for each chemical species were calculated using the following equation.

$$\Delta G_{solv} = E_{el}(DLPNO-CCSD(T)) + \Delta G_{correction}(DFT) + \Delta G^{\circ}_{solv}(DFT)$$

$E_{el}(DLPNO-CCSD(T))$  is the final electronic energy from a DLPNO-CCSD(T)/def2-TZVP calculation,  $\Delta G_{correction}(DFT)$  is the  $G-E_{el}$  (Gibbs free energy minus the electronic energy) from a BP86-D3(BJ)/def2-TZVP calculation, and  $\Delta G^{\circ}_{solv}(DFT)$  is the sum of  $\Delta G_{ENP}(CPCM\ Dielectric)$  and  $\Delta G_{CDS}(Free-energy(cav+disp))$  from an *SMD* single point calculation.

Geometries of optimized molecules can be retrieved from a .xyz file associated with this work.

### Discussion of conversion of IV to (±)-3:

To probe thermodynamics for the conversion of **IV** to (±)-**3**, relative energies were compared, providing  $G_{rel} = 1.7 \text{ kcal mol}^{-1}$  on going from the 1,2,3,6- $\eta^3, \eta^1$ -C<sub>8</sub>H<sub>12</sub> (**IV**) to 1,2,3,5- $\eta^3, \eta^1$ -C<sub>8</sub>H<sub>12</sub> ((±)-**3**) binding motif. On inspection, however, it would appear that the 1,2,3,5- $\eta^3, \eta^1$ -C<sub>8</sub>H<sub>12</sub> isomer does contain the less distorted octahedron (taking C1, C5, and the two phosphines as the equatorial plane).

**Figure S41.** Energetic comparison between **IV** and (±)-**3**.

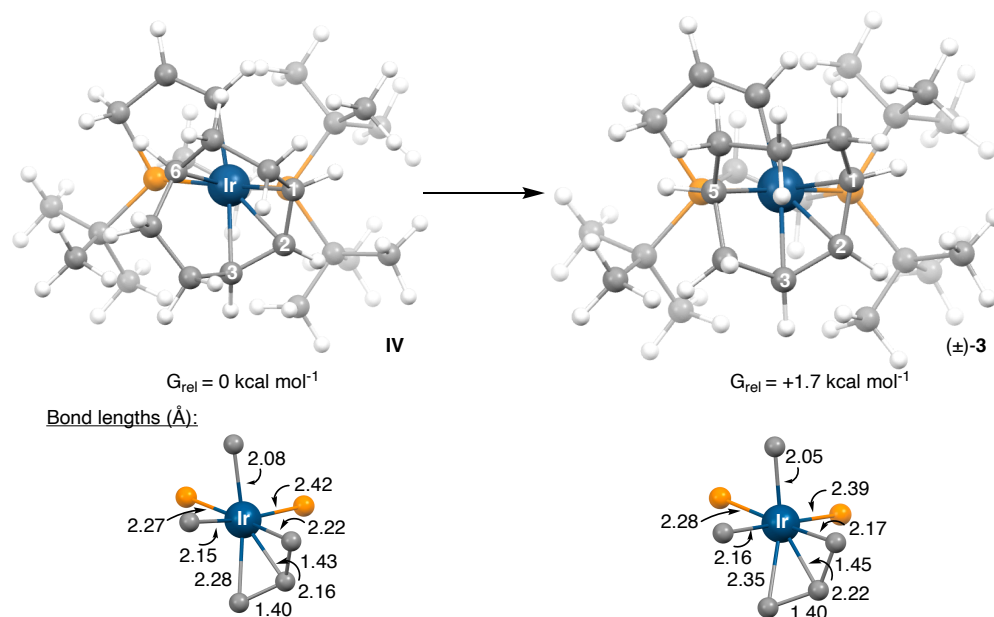

### **Crystallographic details:**

Single crystal X-ray diffraction (scXRD) data for **(±)-1** and **(±)-2** was collected using a Bruker D8 Venture diffractometer equipped with an Apex detector and I $\mu$ S Cu microsource at the University of Windsor. Both crystals were mounted on a MiTeGen loop. Data for **(±)-1** and **(±)-2** was obtained using Molybdenum K- $\alpha$ ,  $\lambda = 0.71 \text{ \AA}$  at 170(2) K. Cell refinement and data reduction were performed using Apex3.<sup>9</sup> An empirical absorption correction, based on the multiple measurements of equivalent reflections and merging of data was performed using SADABS.<sup>10</sup> Data conversion from XDS to SADABS file format was performed using XDS2SAD.<sup>11</sup> The space group was confirmed by XPREP.<sup>12</sup>

Single crystal X-ray diffraction (scXRD) data for **(±)-3** was obtained using a Mitegen polyimide micromount with a small amount of Paratone N oil. All X-ray measurements were made on a Bruker Kappa Axis Apex2 diffractometer at Western University. The unit cell dimensions were determined from a symmetry constrained fit of 9760 reflections with  $4.84^\circ < 2\theta < 60.92^\circ$ . The data collection strategy used  $\varphi$  and  $\omega$  scans which collected data up to  $61.06^\circ$  ( $2\theta$ ). The frame integration was performed using SAINT.<sup>13</sup> The resulting raw data was scaled, and absorption corrected using a multi-scan averaging of symmetry equivalent data using SADABS.<sup>14</sup>

Routine checkCIF and structure factor analyses were performed using Platon.<sup>15</sup> CCDC **2311411-2311413** contains the supplementary crystallographic data for this paper. These data can be obtained free of charge from The Cambridge Crystallographic Data Centre *via* [www.ccdc.cam.ac.uk/data\\_request/cif](http://www.ccdc.cam.ac.uk/data_request/cif).

**Table S2.** Crystallographic data for (**±**)-1 and (**±**)-2.

| Compound                                       | ( <b>±</b> )-1                                                 | ( <b>±</b> )-2                                                |
|------------------------------------------------|----------------------------------------------------------------|---------------------------------------------------------------|
| Empirical formula                              | C <sub>25</sub> H <sub>49</sub> IrP <sub>2</sub>               | C <sub>25</sub> H <sub>47</sub> IrP <sub>2</sub>              |
| Formula weight                                 | 603.78                                                         | 601.76                                                        |
| Temperature/K                                  | 170.0                                                          | 170.0                                                         |
| Crystal system                                 | Orthorhombic                                                   | Orthorhombic                                                  |
| Space group                                    | <i>Pbca</i>                                                    | <i>Pbca</i>                                                   |
| a/Å                                            | 17.8681(5)                                                     | 10.0014(3)                                                    |
| b/Å                                            | 14.8775(4)                                                     | 17.1653(5)                                                    |
| c/Å                                            | 38.0030(10)                                                    | 28.5541(9)                                                    |
| α/°                                            | 90                                                             | 90                                                            |
| β/°                                            | 90                                                             | 90                                                            |
| γ/°                                            | 90                                                             | 90                                                            |
| V/Å <sup>3</sup>                               | 10102.4(5)                                                     | 4901.6(3)                                                     |
| Z                                              | 16                                                             | 8                                                             |
| ρ <sub>calc</sub> g/cm <sup>-3</sup>           | 1.588                                                          | 1.631                                                         |
| μ/mm <sup>-1</sup>                             | 5.423                                                          | 5.588                                                         |
| F(000)                                         | 4896.0                                                         | 2432.0                                                        |
| Crystal size/mm <sup>3</sup>                   | 0.12 × 0.11 × 0.08                                             | 0.15 × 0.1 × 0.07                                             |
| Radiation                                      | MoKα (λ = 0.71073)                                             | MoKα (λ = 0.71073)                                            |
| 2θ range for datacollection/°                  | 3.72 to 56.672                                                 | 4.746 to 56.632                                               |
| Index ranges                                   | -23 ≤ h ≤ 23, -19 ≤ k ≤ 19, -50 ≤ l ≤ 60                       | -13 ≤ h ≤ 13, -22 ≤ k ≤ 22, -38 ≤ l ≤ 37                      |
| Independent reflections                        | 12555 [R <sub>int</sub> = 0.0940, R <sub>sigma</sub> = 0.0209] | 6082 [R <sub>int</sub> = 0.0441, R <sub>sigma</sub> = 0.0177] |
| Data/restraints/parameters                     | 12555/27/507                                                   | 6082/0/263                                                    |
| Goodness-of-fit on F <sup>2</sup>              | 1.207                                                          | 1.149                                                         |
| R [I>=2θ (I)] (R1, wR2)                        | R <sub>1</sub> = 0.0540, wR <sub>2</sub> = 0.1090              | R <sub>1</sub> = 0.0204, wR <sub>2</sub> = 0.0445             |
| R (all data) (R1, wR2)                         | R <sub>1</sub> = 0.0716, wR <sub>2</sub> = 0.1191              | R <sub>1</sub> = 0.0238, wR <sub>2</sub> = 0.0465             |
| Largest diff. peak/hole / (e Å <sup>-3</sup> ) | 6.37/-3.69                                                     | 1.90/-1.10                                                    |

$$R_1 = \frac{\sum ||F_o| - |F_c||}{\sum |F_o|}; wR_2 = [\frac{\sum (w(F_o^2 - F_c^2)^2)}{\sum w(F_o^2)^2}]^{1/2}$$



**Table S3.** Crystallographic data for ( $\pm$ )-3.

|                                                                                                   |                                                                              |
|---------------------------------------------------------------------------------------------------|------------------------------------------------------------------------------|
| Compound                                                                                          | ( $\pm$ )-3                                                                  |
| Empirical formula                                                                                 | C <sub>25</sub> H <sub>47</sub> IrP <sub>2</sub>                             |
| Formula weight                                                                                    | 601.76                                                                       |
| Temperature/K                                                                                     | 110.0                                                                        |
| Crystal system                                                                                    | Monoclinic                                                                   |
| Space group                                                                                       | <i>P2<sub>1</sub>/c</i>                                                      |
| <i>a</i> /Å                                                                                       | 10.405(9)                                                                    |
| <i>b</i> /Å                                                                                       | 18.494(13)                                                                   |
| <i>c</i> /Å                                                                                       | 13.748(10)                                                                   |
| $\alpha$ /°                                                                                       | 90                                                                           |
| $\beta$ /°                                                                                        | 109.51(3)                                                                    |
| $\gamma$ /°                                                                                       | 90                                                                           |
| <i>V</i> /Å <sup>3</sup>                                                                          | 2494(3)                                                                      |
| <i>Z</i>                                                                                          | 4                                                                            |
| $\rho_{\text{calc}}$ g/cm <sup>-3</sup>                                                           | 1.603                                                                        |
| $\mu$ /mm <sup>-1</sup>                                                                           | 5.492                                                                        |
| <i>F</i> (000)                                                                                    | 1216.0                                                                       |
| Crystal size/mm <sup>3</sup>                                                                      | 0.102 × 0.098 × 0.042                                                        |
| Radiation                                                                                         | MoK $\alpha$ ( $\lambda$ = 0.71073)                                          |
| 2 $\theta$ range for datacollection/°                                                             | 3.838 to 51.43                                                               |
| Index ranges                                                                                      | -12 ≤ <i>h</i> ≤ 12, -22 ≤ <i>k</i> ≤ 22, -16 ≤ <i>l</i> ≤ 16                |
| Independent reflections                                                                           | 4783 [ <i>R</i> <sub>int</sub> = 0.1374, <i>R</i> <sub>sigma</sub> = 0.0633] |
| Data/restraints/parameters                                                                        | 4738/0/262                                                                   |
| Goodness-of-fit on <i>F</i> <sup>2</sup>                                                          | 1.034                                                                        |
| <i>R</i> [ <i>I</i> ≥ 2 $\theta$ ( <i>I</i> )] ( <i>R</i> <sub>1</sub> , <i>wR</i> <sub>2</sub> ) | <i>R</i> <sub>1</sub> = 0.0384, <i>wR</i> <sub>2</sub> = 0.0812              |
| <i>R</i> (all data) ( <i>R</i> <sub>1</sub> , <i>wR</i> <sub>2</sub> )                            | <i>R</i> <sub>1</sub> = 0.0658, <i>wR</i> <sub>2</sub> = 0.0914              |
| Largest diff. peak/hole / (e Å <sup>-3</sup> )                                                    | 1.60/-1.45                                                                   |

$$R_1 = \frac{\sum ||F_o| - |F_c||}{\sum |F_o|}; wR_2 = [\frac{\sum (w(F_o^2 - F_c^2)^2)}{\sum w(F_o^2)^2}]^{1/2}$$

## **References:**

- <sup>1</sup> A. Abiko. *Org. Synth.* **2002**, 79, 103.
- <sup>2</sup> Clapson, M. L.; Sharma, H.; Zurakowski, J. A.; Drover, M. W. *Chem. Eur. J.* **2023**, 29, e202203763.
- <sup>3</sup> Neese, F. Software Update: The ORCA Program – Version 5.0. *WIREs Comput. Mol. Sci.* **2022**, 12, e1606.
- <sup>4</sup> a) S. Grimme, S. Ehrlich, L. Goerigk, *J. Comput. Chem.* **2011**, 32, 1456; b) S. Grimme, J. Antony, S. Ehrlich, H. Krieg, *J. Chem. Phys.* **2010**, 132, 154104; c) F. Weigend, R. Ahlrichs, *Phys. Chem. Chem. Phys.* **2005**, 7, 3297.
- <sup>5</sup> F. Weigend, *Phys. Chem. Chem. Phys.* **2006**, 8, 1057.
- <sup>6</sup> a) C. Riplinger, P. Pinski, U. Becker, E.F. Valeev, F. Neese, *J. Chem. Phys.* **2016**, 144, 024109; b) C. Riplinger, B. Sandhoefer, A. Hansen, F. Neese, *J. Chem. Phys.* **2013**, 139, 134101; c) C. Riplinger, F. Neese, *J. Chem. Phys.* **2013**, 138, 034106.
- <sup>7</sup> A. Hellweg, C. Hattig, S. Hofener, W. Klopper, *Theor. Chim. Acta* **1990**, 77, 123.
- <sup>8</sup> a) G. Knizia, J.E.M.N. Klein, *Angew. Chem. Int. Ed.* **2015**, 54, 5518; b) G. Knizia, *J. Chem. Theory Comput.* **2013**, 9, 4834.
- <sup>9</sup> Bruker (2016). APEX3, SAINT and SADABS. Bruker AXS Inc., Madison, Wisconsin, USA.
- <sup>10</sup> L. Krause, R. Herbst-Irmer, G. M. Sheldrick, and D. Stalke, *J. Appl. Cryst.* **2015**, 48, 3-10.
- <sup>11</sup> XDS2SAD, G. M. Sheldrick, **2008**, University of Gottingen, Germany.
- <sup>12</sup> a) XPREP, **2014**, Bruker AXS Inc., Madison, Wisconsin, USA. b) XPREP Version 2008, G. M. Sheldrick, 2008 Bruker AXS Inc., Madison, Wisconsin, USA.
- <sup>13</sup> Bruker-AXS, SAINT version 2013.8, **2013**, Bruker-AXS, Madison, WI 53711, USA
- <sup>14</sup> Bruker-AXS, SADABS version 2012.1, **2012**, Bruker-AXS, Madison, WI 53711, USA
- <sup>15</sup> A. L. Spek, *Acta Cryst.* **2009**, D65, 148.
